# Supplementary material for: Copper complexes as catalyst precursors in the electrochemical hydrogen evolution reaction
Source: Royal Society of Chemistry journal article supplement (doi:10.1039/c6dt00082g), 2016-01-01
Supplement: c6dt00082g1.pdf [file c6dt00082g1.pdf]

## Supporting Information

### Copper Complexes as Catalyst Precursor in the Electrochemical Hydrogen Evolution Reaction

Merle Kügler,<sup>[a]</sup> Julius Scholz,<sup>[b]</sup> Andreas Kronz,<sup>[c]</sup> Inke Siewert<sup>[a]\*</sup>

[a] Georg-August-University Göttingen, Institute of Inorganic Chemistry, Tammannstrasse 4, D-37077 Göttingen, Germany

[b] Georg-August-University Göttingen, Institut für Materialphysik, Friedrich-Hund-Platz 1, D-37077 Göttingen.

[c] Georg-August-University Göttingen, Geowissenschaftliches Zentrum, Goldschmidtstrasse 1, D-37077 Göttingen, Germany

#### Table of Content

|                                                                                     |    |
|-------------------------------------------------------------------------------------|----|
| 1) Experimental .....                                                               | 2  |
| a) Instrumental details .....                                                       | 2  |
| b) Potentiometric Titrations .....                                                  | 2  |
| c) Spectrophotometric Titrations .....                                              | 2  |
| A Varian Cary 50 Bio UV/Visible spectrophotometer was used in the experiments. .... | 2  |
| d) CPE-MS experiments .....                                                         | 2  |
| e) Experimental Procedures .....                                                    | 3  |
| 2) Molecular Structure .....                                                        | 6  |
| a) X-ray Crystallography .....                                                      | 6  |
| b) Hydrogen Bond Network .....                                                      | 7  |
| 3) $pK_a$ -Determinations of the Ligands .....                                      | 8  |
| a) Potentiometric Determinations of the $pK_a$ of $L^2$ and $L^3$ .....             | 8  |
| b) Spectrophotometric Titrations for the Determination of the $pK_a$ of $L^4$ ..... | 9  |
| 4) Spectrophotometric Titrations .....                                              | 10 |
| a) Species Distributions of the $L^{1-4}$ -Cu(II) Systems in MeOH/Water .....       | 10 |
| i) Complex <b>3bH</b> <sub>1</sub> .....                                            | 10 |
| ii) Complex <b>4bH</b> <sub>1</sub> .....                                           | 12 |
| iii) Complex <b>1bH</b> <sub>3</sub> .....                                          | 14 |
| iv) Complex <b>2bH</b> <sub>3</sub> .....                                           | 16 |
| b) Species Distributions in Water .....                                             | 17 |
| i) Employing $L^1$ .....                                                            | 17 |

|                                              |    |
|----------------------------------------------|----|
| ii) Employing L <sup>5</sup> .....           | 19 |
| 5) Electrochemical Studies .....             | 21 |
| 6) Electron Microprobe Analysis (EMPA) ..... | 27 |
| a) Sample preparation .....                  | 27 |
| b) Measurement .....                         | 27 |
| 7) XPS Measurements .....                    | 29 |
| a) Sample Preparation .....                  | 29 |
| b) Measurement .....                         | 29 |
| 8) References .....                          | 31 |

## 1) Experimental

### a) Instrumental details

Microanalyses were performed on an *Elementar Vario El II* elemental analyser. IR spectra were recorded using samples prepared as KBr pellets with a *Bruker VERTEX 70* FTIR-spectrometer. Mass spectra were recorded on a *Bruker APEX IV micrOTOF*, or a *Bruker Autoflex Speed* mass spectrometer. UV/Vis spectra were recorded with a *Varian Cary50 Scan*. The ligands L<sup>1</sup> and L<sup>3</sup> were synthesised according to previous reported literature procedures.<sup>[1]</sup>

### b) Potentiometric Titrations

The ligands L<sup>1[1]</sup>, L<sup>2</sup> and L<sup>3</sup> were studied in a mixture of MeOH/water (80/20 by weight). The ionic strength was fixed at  $I = 0.1$  M with KCl. The titrations were performed using a *Metrohm 809 Titrand* system equipped in combined glass electrode (*Metrohm 6.0234.100*) filled with 0.1 M KCl (L<sup>2</sup>)/ NaCl (L<sup>3</sup>) in MeOH/water (80/20 by weight). ~0.1 M KOH solution was prepared in a MeOH/water mixture (80/20 by weight), standardised by titration with potassium hydrogen phthalate and added by a *Metrohm 800 Dosino* auto burette. The ionic product of water under the used conditions was  $10^{-14.42} \text{ mol}^2 \text{ dm}^{-3[2]}$ . The purity and exact concentration of the ligand were determined by the method of Gran. All titrations were carried out as 3.0 mL samples in a thermostatted cell at  $25 \pm 0.2$  °C under a stream of inert gas.

### c) Spectrophotometric Titrations

In MeOH/water: UV/Vis spectra were collected with 1 cm optical length cuvettes. The pH values were measured by a combined glass electrode (*Metrohm 6.0234.100*) filled with 0.1 M NaCl solution (MeOH/water, 80/20 by weight). The spectra were collected in 2.5 mL samples.

In water: UV/Vis spectra were collected with 1 cm optical length cuvettes. The pH values were measured by a combined glass electrode (*Metrohm 6.0234.100*) filled with 3 M aqueous KCl solution. The spectra were collected in 2.5 mL samples.

A Varian Cary 50 Bio UV/Visible spectrophotometer was used in the experiments.

### d) CPE-MS experiments

The MS was a Pfeiffer vacuum ThermoStar GSD 320 T. The MS was connect to the electrolysis cell via a thin glass capillary of ~1.5 m (heated by a heating mantel to 200°C, inlet temperature 100°C), a three-way ball valve with connections to the glass capillary, a needle and inert gas. The special set up led to

delay in the measurement. Measurements in MeCN were conducted in dry and distilled MeCN with a three electrode setup, a glassy carbon electrode as working electrode, a platinum wire as counter electrode and a silver wire as pseudo reference. The measurements were referenced by adding ferrocene to the solution.

#### e) Experimental Procedures

Overview on the of synthesis of the ligands  $L^2$  and  $L^4$

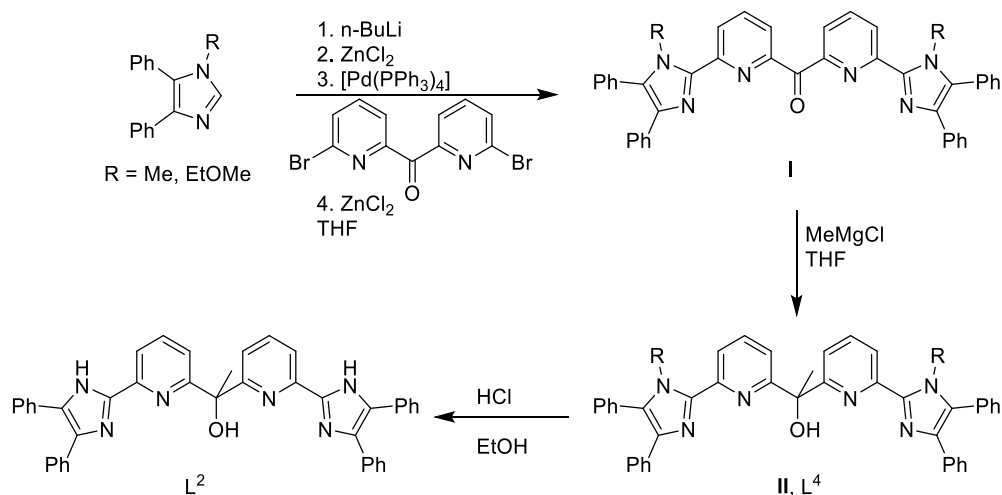

**I:** *n*-BuLi (1.6 M, 11 mL, 18 mmol) was added to a solution of phenylimidazole (18 mmol) dissolved in THF (50 mL) at -78 °C. After 1 h, a solution of dry ZnCl<sub>2</sub> (2.4 g, 18 mmol) in THF (50 mL) was added and the reaction mixture was allowed to warm to rt. Subsequently, a mixture of bis(6-bromopyridine-2-yl)methanone (2.0 g, 5.8 mmol) and Pd(PPh<sub>3</sub>)<sub>4</sub> (0.34 g, 0.30 mmol) in THF (50 mL) was added and the reaction mixture stirred for 1.5 h at 60 °C in a closed vessel. The reaction mixture was cooled to rt and a solution of dry ZnCl<sub>2</sub> (4.8 g, 36 mmol) in THF (100 mL) was added. The reaction mixture was stirred for additional 5 h at 60 °C, then cooled down to rt and added to a solution of Na<sub>2</sub>EDTA·2H<sub>2</sub>O in water (0.24 M, 450 mL). The pH of the aq. phase was adjusted to 8 with aq. Na<sub>2</sub>CO<sub>3</sub>-solution (10%) and the crude product was extracted with dichloromethane. The combined organic phases were washed with brine and dried over MgSO<sub>4</sub>. The solvent was removed under reduced pressure. The compounds were purified by column chromatography (silica gel, hexane/ethyl acetate 4:1 + 2 % NEt<sub>3</sub>). a) *Bis(6-(1-(ethoxymethyl)-4,5-diphenylimidazole-2-yl)pyridine-2-yl)-methanone*, yellow powder, yield 81 % (3.4 g, 4.8 mmol). <sup>1</sup>H-NMR (CDCl<sub>3</sub>): δ = 8.59 (dd, *J* = 7.1, 2.1 Hz, 2 H, H<sup>5-py</sup>), 8.20-7.84 (m, 4, H<sup>3,4-py</sup>), 7.55-7.44 (m, 4 H, H<sup>ph</sup>), 7.42-7.34 (m, 10 H, H<sup>ph</sup>), 7.25-7.13 (m, 6 H, H<sup>ph</sup>), 5.61 (s, 4 H, N-CH<sub>2</sub>-O), 3.06 (q, *J* = 7.0 Hz, 4 H, O-CH<sub>2</sub>-Me), 0.83 (t, *J* = 7.0 Hz, 6 H, Me). <sup>13</sup>C-NMR (CDCl<sub>3</sub>): δ = 192.6 (C=O), 153.2 (C<sup>2/6-py</sup>), 150.0 (C<sup>2/6-py</sup>), 143.6 (C<sup>2-im</sup>), 138.7 (C<sup>4-im</sup>), 137.6 (C<sup>4-py</sup>), 134.0 (C<sup>ph</sup>), 132.6 (C<sup>5-im</sup>), 131.1 (C<sup>ph</sup>), 130.0 (C<sup>ph</sup>), 128.8 (C<sup>ph</sup>), 128.7 (C<sup>ph</sup>), 128.1 (C<sup>ph</sup>), 127.0 (C<sup>ph</sup>), 126.6 (C<sup>ph</sup>), 126.1 (C<sup>5-py</sup>), 123.6 (C<sup>3-py</sup>), 73.4 (N-CH<sub>2</sub>-O), 63.4 (O-CH<sub>2</sub>-Me), 14.7 (Me). MS (ESI+, MeCN): *m/z* = 737.3 ([M+H]<sup>+</sup>), 775.3 ([M+K]<sup>+</sup>). IR (KBr): ν (cm<sup>-1</sup>) = 3057 (w), 2973 (w), 2927 (w), 1685 (s), 1602 (s), 1584 (m), 1501 (m), 1474 (s), 1442 (s), 1411 (m), 1377 (m), 1325 (m), 1267 (m), 1243 (w), 1205 (w), 1156 (w), 1097 (s), 1023 (w), 992 (w), 957 (m), 916 (w), 837 (w), 800 (w), 775 (s), 722 (m), 697 (s), 635 (w). b) *Bis(6-(1-(methyl)-4,5-diphenylimidazole-2-yl)pyridine-2-yl)-methanone*, white powder, 65 % (2.5 g, 3.8 mmol). <sup>1</sup>H-NMR (CDCl<sub>3</sub>): δ = 8.56 (dd, *J* = 5.4, 3.7 Hz, 2 H, H<sup>5-py</sup>), 8.00-7.98 (m, 4 H, H<sup>3,4-py</sup>), 7.54-7.47 (m, 6 H, H<sup>ph</sup>), 7.43-7.30 (m, 6 H, H<sup>ph</sup>), 7.27-7.07 (m, 8 H, H<sup>ph</sup>), 3.59 (s, 6 H, NMe). <sup>13</sup>C-NMR (CDCl<sub>3</sub>): δ = 193.1 (C=O), 153.4 (C<sup>2/6-py</sup>), 150.1 (C<sup>2/6-py</sup>), 143.8 (C<sup>2-im</sup>), 138.3 (C<sup>4-im</sup>), 137.4 (C<sup>3-py</sup>), 134.4 (C<sup>ph</sup>), 132.8 (C<sup>5-im</sup>), 131.1 (C<sup>ph</sup>), 130.9 (C<sup>ph</sup>), 130.5 (C<sup>ph</sup>), 129.1 (C<sup>ph</sup>), 128.9 (C<sup>ph</sup>), 128.2 (C<sup>ph</sup>), 127.0 (C<sup>ph</sup>), 125.8 (C<sup>5-py</sup>), 123.1 (C<sup>4-py</sup>), 34.2 (NMe). MS (EI): *m/z* = 648 (100, [M]<sup>+</sup>), 633 (13, [M-Me]<sup>+</sup>), 324 (22, [M]<sup>2+</sup>). IR (KBr): ν (cm<sup>-1</sup>) = 3056 (w), 2924 (m), 2854 (w), 1684

(m), 1584 (s), 1502 (w), 1472 (s), 1443 (m), 1384 (m), 1318 (w), 1261 (w), 1241 (w), 1154 (w), 1074 (m), 1025 (w), 992 (w), 957 (m), 915 (w), 844 (w), 791 (m), 774 (s), 720 (w), 696 (s), 651 (w).

**II**, **L**<sup>4</sup>: MeMgCl (3.0 M, 1.4 eq) was added slowly to a solution of **I** (1.0 eq) in THF (150 mL) at 0 °C. The reaction mixture was allowed to warm to rt and stirred overnight. Subsequently, the reaction was quenched with water. The organic layer was separated, the aqueous layer was extracted several times with dichloromethane and the combined organic layers were washed with brine and dried over MgSO<sub>4</sub>. The solvent was evaporated under reduced pressure. **L**<sup>4</sup> and **II** were purified by column chromatography (silica gel, hexane/ethyl acetate 4:1 + 2 % NEt<sub>3</sub>). **1,1-Bis(6-1-(ethoxymethyl)imidazole-2-yl)pyridine-2-yl)ethanol**, **II**: pale yellow powder, yield 78 % (2.8 g, 3.7 mmol). <sup>1</sup>H-NMR (CDCl<sub>3</sub>): δ = 8.22 (dd, *J* = 7.6, 2.1 Hz, 2 H, H<sup>5-py</sup>), 7.87-7.62 (m, 4 H, H<sup>3/4-py</sup>), 7.60-7.37 (m, 14 H, H<sup>ph</sup>), 7.27-7.07 (m, 6 H, H<sup>ph</sup>), 6.59 (s, 1 H, OH), 5.75 (d, *J* = 9.8 Hz, 2 H, NCH<sub>2</sub>O), 5.63 (d, *J* = 9.8 Hz, 2 H, NCH<sub>2</sub>O), 3.27 (q, *J* = 7.0 Hz, 4 H, OCH<sub>2</sub>Me), 2.07 (s, 3 H, C-(OH)-Me), 1.08 (t, *J* = 7.0 Hz, 6 H, OCH<sub>2</sub>Me). <sup>13</sup>C-NMR (CDCl<sub>3</sub>): δ = 163.8 (C<sup>2-py</sup>), 148.6 (C<sup>6-py</sup>), 145.1 (C<sup>2-im</sup>), 138.4 (C<sup>4-im</sup>), 137.8 (C<sup>4-py</sup>), 134.4 (C<sup>ph</sup>), 132.2 (C<sup>5-im</sup>), 131.5 (C<sup>ph</sup>), 130.5 (C<sup>ph</sup>), 129.1 (C<sup>ph</sup>), 129.0 (C<sup>ph</sup>), 127.2 (C<sup>ph</sup>), 126.8 (C<sup>ph</sup>), 122.0 (C<sup>5-py</sup>), 119.8 (C<sup>3-py</sup>), 77.1 (C-(OH)-Me), 74.0 (N-CH<sub>2</sub>-O), 64.0 (O-CH<sub>2</sub>-Me), 28.8 (C-(OH)-Me), 15.1 (-CH<sub>2</sub>-Me). MS (ESI+, MeCN): *m/z* = 753.0 ([M+H]<sup>+</sup>), 775.0 ([M+Na]<sup>+</sup>). IR (KBr): ν (cm<sup>-1</sup>) = 3367 (m, broad), 3056 (w), 2929 (w), 1570 (s), 1475 (s), 1442 (s), 1379 (m), 1326 (w), 1269 (w), 1200 (w), 1094 (s), 961 (m), 824 (m), 775 (s), 699 (s). **1,1-Bis(6-1-(methyl)imidazole-2-yl)pyridine-2-yl)ethanol**, **L**<sup>4</sup>: colourless powder, yield: 62 % (1.6 g, 2.3 mmol). <sup>1</sup>H-NMR (CDCl<sub>3</sub>): δ = 8.20 (dd, *J* = 7.8, 0.9 Hz, 2 H, H<sup>5-py</sup>), 7.77 (t, *J* = 7.8 Hz, 2 H, H<sup>4-py</sup>), 7.61 (dd, *J* = 7.8, 0.9 Hz, 2 H, H<sup>3-py</sup>), 7.56-7.44 (m, 10 H, H<sup>ph</sup>), 7.42-7.38 (m, 4 H, H<sup>ph</sup>), 7.25-7.14 (m, 6 H, H<sup>ph</sup>), 5.93 (s, 1 H, OH), 3.83 (s, 6 H, NMe). <sup>13</sup>C-NMR (CDCl<sub>3</sub>): δ = 163.5 (C<sup>2-py</sup>), 149.2 (C<sup>6-py</sup>), 144.8 (C<sup>2-im</sup>), 137.8 (C<sup>4-py</sup>), 131.2 (C<sup>5-im</sup>), 130.9 (C<sup>4-im</sup>), 129.2 (C<sup>ph</sup>), 128.9 (C<sup>ph</sup>), 128.3 (C<sup>ph</sup>), 127.1 (C<sup>ph</sup>), 126.6 (C<sup>ph</sup>), 122.3 (C<sup>3-py</sup>), 119.4 (C<sup>5-py</sup>), 77.1 (C-(OH)-Me), 34.4 (NCH<sub>3</sub>), 28.7 (Me). MS (ESI, MeCN): *m/z* = 665.3 ([M+H]<sup>+</sup>), 687.3 ([M+Na]<sup>+</sup>). IR (KBr): ν (cm<sup>-1</sup>) = 3203 (m, broad), 3059 (m), 3003 (m), 2982 (m), 2954 (m), 1897 (w), 1820 (w), 1603 (s), 1574 (s), 1502 (s), 1471 (s), 1385 (s), 1359 (s), 1322 (s), 1262 (s), 1221 (s), 1172 (s), 1131 (s), 1104 (s), 1089 (s), 1024 (m), 995 (m), 963 (s), 916 (s), 845 (s), 822 (s), 787 (s), 777 (s), 759 (s), 745 (s), 727 (s), 699 (s), 659 (m), 643 (m), 521 (m), 503 (m). C<sub>44</sub>H<sub>36</sub>N<sub>6</sub>O calcd. C 79.5, H 5.46, N 12.4; found C 79.4, H 5.70, N 12.6.

**L**<sup>2</sup>: **II** (2.8 g, 3.7 mmol) was dissolved in a mixture of hydrochloric acid and water (1:1, 60 mL) and stirred at 60 °C for 4 h. The reaction mixture was neutralised with sodium hydroxide (35 % in water) and saturated aqueous sodium hydrocarbonate at 0 °C. The crude material was extracted several times with dichloromethane, washed with brine and dried over MgSO<sub>4</sub>. **L**<sup>2</sup> was purified by column chromatography (silica gel, hexane/ethyl acetate 1:1 + 5 % NEt<sub>3</sub>). **1,1-Bis(6-(4,5-diphenylimidazole-2-yl)pyridine-2-yl)ethanol**, **L**<sup>2</sup>: white powder, yield: 45 % (1.1 g, 1.7 mmol). <sup>1</sup>H-NMR (CDCl<sub>3</sub>): δ = 13.09 (s, 2 H, NH), 7.99 (dd, *J* = 5.8, 3.0 Hz, 2 H, H<sup>5-py</sup>), 7.92-7.83 (m, 4 H, H<sup>3/4-py</sup>), 7.63-7.40 (m, 14 H, H<sup>ph</sup>), 7.36-7.16 (m, 6 H, H<sup>ph</sup>), 6.88 (s, 1 H, OH), 2.09 (s, 3 H, Me). <sup>13</sup>C-NMR (CDCl<sub>3</sub>): δ = 164.4 (C<sup>2-py</sup>), 146.7 (C<sup>6-py</sup>), 145.1 (C<sup>2-im</sup>), 137.9 (C<sup>3/4-py</sup>), 134.8 (C<sup>4/5-im</sup>), 131.1 (C<sup>4/5-im</sup>), 129.2 (C<sup>ph</sup>), 128.7 (C<sup>ph</sup>), 128.2 (C<sup>ph</sup>), 126.9 (C<sup>ph</sup>), 119.8 (C<sup>3/4-py</sup>), 117.6 (C<sup>5-py</sup>), 76.9 (C-(OH)-Me), 29.0 (Me). MS (ESI+, MeOH): *m/z* = 637.3 ([M+H]<sup>+</sup>), 659.3 ([M+Na]<sup>+</sup>). IR (KBr): ν (cm<sup>-1</sup>) = 3167 (m, broad), 1591 (m), 1570 (s), 1476 (s), 1445 (s), 1258 (w), 1162 (m), 1073 (m), 767 (s), 695 (s). C<sub>42</sub>H<sub>32</sub>N<sub>6</sub>O·H<sub>2</sub>O calcd. C 77.0, H 5.23, N 12.8; found C 76.8, H 5.79, N 12.4.

The synthesis of the ligand **L**<sup>5</sup> was already reported,<sup>[3]</sup> but we used a different procedure.

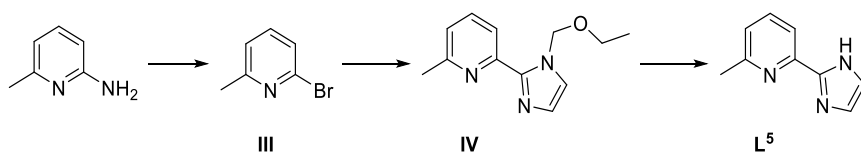

III: According to literature.<sup>[4]</sup>

**IV**, 2-(1-(Ethoxymethyl)-1H-imidazol-2-yl)-6-methyl-pyridine: *n*-BuLi (1.6 M in hexane, 18.3 mL, 29.3 mmol, 1.03 eq.) was added to a solution of 1-ethoxymethyl-imidazole (3.57 g, 25.8 mmol, 1.00 eq.) in thf (10 mL) at  $-78^{\circ}\text{C}$ . After 15 min of stirring, a solution of  $\text{ZnCl}_2$  (10.6 g, 77.5 mmol, 2.7 eq) in thf (20 mL) was added and the reaction mixture allowed to warm to rt. A mixture of **III** (5.00 g, 25.8 mmol, 1.00 eq) and  $\text{Pd}(\text{PPh}_3)_4$  (290 mg, 8 mol%) in thf (20 mL) was added and the reaction mixture stirred at  $60^{\circ}\text{C}$  for 5 h. The mixture was cooled to rt, poured into a solution of  $\text{Na}_2\text{EDTA} \cdot 2\text{H}_2\text{O}$  (~3 eq.) in water, the pH was adjusted to 8 with aqueous  $\text{Na}_2\text{CO}_3$  solution (10 %) and the aq. layer was extracted three times with dichloromethane. The combined organic extracts were washed with brine, dried over  $\text{MgSO}_4$  and concentrated *in vacuo*. The crude product was purified by column chromatography on silica gel (hexane/EtOAc 1:1 + 3 %  $\text{NEt}_3$ ) to give **IV** as a colourless oil (average yield 68 %, 4.27g). *Analytical data*:  $^1\text{H}$ -NMR ( $\text{CDCl}_3$ ):  $\delta$  = 7.97 (ddd,  $J$  = 7.9, 1.1, 0.6 Hz, 1H,  $\text{H}^{3\text{-py}}$ ), 7.65 (t,  $J$  = 7.8 Hz, 1H,  $\text{H}^{4\text{-py}}$ ), 7.21 (d,  $J$  = 1.3 Hz, 1H,  $\text{H}^{5\text{-im}}$ ), 7.15 (d,  $J$  = 1.3 Hz, 1H,  $\text{H}^{4\text{-im}}$ ), 7.09 (ddd,  $J$  = 7.7, 1.0, 0.5 Hz, 1H,  $\text{H}^{5\text{-py}}$ ), 6.10 (s, 2H,  $\text{N-CH}_2\text{-O}$ ), 3.53 (q,  $J$  = 7.0 Hz, 2H,  $\text{O-CH}_2\text{-Me}$ ), 2.57 (s, 3H, Me) 1.15 (t,  $J$  = 7.0 Hz, 3H,  $\text{O-CH}_2\text{-Me}$ ).  $^{13}\text{C}\{^1\text{H}\}$ -NMR ( $\text{CDCl}_3$ ):  $\delta$  = 159.9 ( $\text{C}^{6\text{-py}}$ ), 149.8 ( $\text{C}^{2\text{-py}}$ ), 145.1 ( $\text{C}^{2\text{-im}}$ ), 137.2 ( $\text{C}^{4\text{-py}}$ ), 129.0 ( $\text{C}^{4\text{-im}}$ ), 122.3 ( $\text{C}^{5\text{-py}}$ ), 122.3 ( $\text{C}^{5\text{-im}}$ ), 120.1 ( $\text{C}^{3\text{-py}}$ ), 77.1 ( $\text{N-CH}_2\text{-O}$ ), 64.3 ( $\text{O-CH}_2\text{-Me}$ ), 24.5 (Me), 15.1 ( $\text{O-CH}_2\text{-Me}$ ). MS (ESI<sup>+</sup> (MeCN)):  $m/z$  = 218.1 ( $[\text{M}+\text{H}]^+$ ).

**L<sup>5</sup>**, 2-(1H-imidazol-2-yl)-6-methylpyridine: A solution of **IV** (4.27 g, 19.2 mmol, 1.00 eq.) in EtOH (15 mL) was treated with HCl (37 %, 15 mL) and stirred at  $80^{\circ}\text{C}$  for 5 h. Afterwards the pH was adjusted to 8 with an aqueous solution of  $\text{Na}_2\text{CO}_3$  (10 %) and the aqueous layer was extracted with  $\text{CH}_2\text{Cl}_2$ . The combined organic extracts were washed with an aqueous, saturated solution of NaCl, dried over  $\text{MgSO}_4$ , filtered and concentrated *in vacuo*. The crude product was purified by column chromatography on silica gel with hexane/EtOAc 1:1 + 5%  $\text{NEt}_3$  as eluent to give **L<sup>5</sup>** as colourless solid (2.06 g, 12.9 mmol, 38 %). *Additional analytical data*:  $^1\text{H}$ -NMR ( $\text{CDCl}_3$ ):  $\delta$  = 10.85 (s, 1H, NH), 7.98-7.95 (m, 1H,  $\text{H}^{3\text{-py}}$ ), 7.65 (t,  $J$  = 7.8 Hz, 1H,  $\text{H}^{4\text{-py}}$ ), 7.17 (d,  $J$  = 7.0 Hz, 2H,  $\text{H}^{\text{im}}$ ), 7.12 – 6.98 (m, 2H,  $\text{H}^{5\text{-py}}$ ), 2.52 (s, 3H, Me).  $^{13}\text{C}\{^1\text{H}\}$ -NMR ( $\text{CDCl}_3$ ):  $\delta$  = 157.9 ( $\text{C}^{6\text{-py}}$ ), 148.0 ( $\text{C}^{2\text{-py}}$ ), 146.7 ( $\text{C}^{2\text{-im}}$ ), 137.5 ( $\text{C}^{4\text{-py}}$ ), 130.5 ( $\text{C}^{4/5\text{-im}}$ ), 122.9 ( $\text{C}^{5\text{-py}}$ ), 117.0 ( $\text{C}^{4/5\text{-py}}$ ), 116.9 ( $\text{C}^{3\text{-py}}$ ), 24.4 (Me). MS (EI):  $m/z$  (%) = 159.1 (100,  $[\text{M}]^+$ ), 144.1 (20,  $[\text{M-Me}]^+$ ), 92.1 (15,  $[\text{M-Im}]^+$ ).

### Complex Synthesis

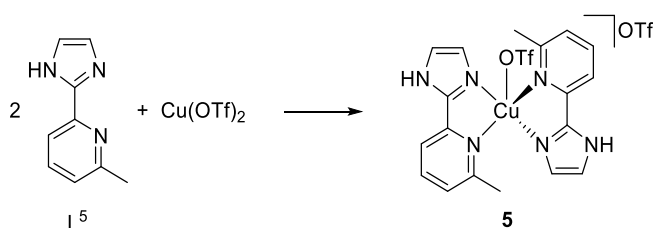

**5**: **L<sup>5</sup>** (150 mg, 0.92 mmol, 2.00 eq) and  $\text{Cu}(\text{OTf})_2$  (166 mg, 0.46 mmol, 1.00 eq) were dissolved in methanol and stirred at rt for 2 h. Diethylether was added to the reaction mixture, the resulting precipitate collected and washed with thf three times. The green powder was dried *in vacuo* to give **5** (302 mg, 0.79 mmol, 86 %). A X-Ray diffraction experiment of single crystals confirmed the connectivity of the atoms but the quality of the data set does not allow for publication. The coordination of two equivalents of ligand was confirmed. These two ligands and the anion build up a distorted trigonal bipyramidal coordination sphere around the copper core. The change from the square pyramidal to the trigonal bipyramidal coordination sphere around the copper(II) ion is caused by steric hindrance between the methyl groups in 6-position of the pyridinyl moieties. *Analytical data*: MS (ESI<sup>+</sup> (MeOH)):  $m/z$  = 530.0 ( $[\text{M-OTf}]^+$ ), 380.1 ( $[\text{M-H-2OTf}]^+$ ). HR-MS: calculated  $\text{C}_{19}\text{H}_{18}\text{CuF}_3\text{N}_6\text{O}_3\text{S}$ : 530.0404, found: 530.0408.  $\text{C}_{20}\text{H}_{18}\text{CuF}_6\text{N}_6\text{O}_6\text{S}_2 \cdot 2\text{H}_2\text{O}$  calcd.: C 33.6, H 3.10, N 11.7, S 8.95; found C 34.0, H 3.10, N 11.7, S

9.45, IR (KBr):  $\nu$  (cm<sup>-1</sup>) = 3651 (m), 3214 (m), 3126 (w), 2948 (w), 1627 (m), 1569 (m), 1482 (s), 1447 (w), 1410 (w), 1294 (s), 1246 (vs)\*, 1166 (s)\*, 1105 (m), 1038 (s)\*, 973 (m), 878 (m), 854 (m), 804 (w), 779 (m), 746 (m), 713 (m), 688 (m). \* = triflate anion<sup>[5]</sup>

## 2) Molecular Structure

### a) X-ray Crystallography

X-ray data were collected with a *STOE IPDS II* diffractometer (graphite monochromated Mo-K $\alpha$  radiation,  $\lambda$  = 0.71073 Å) by use of  $\omega$  scans at -140 °C. The structure was solved by direct methods and refined on  $F^2$  using all reflections with SHELX-2013.<sup>[6]</sup> Most non-hydrogen atoms were refined anisotropically. Most hydrogen atoms were placed in calculated positions and assigned to an isotropic displacement parameter of 1.2 / 1.5  $U_{eq}$ (C). Face-indexed absorption corrections were performed numerically with the programme X-RED.<sup>[7]</sup> CCDC-1442849, CCDC-1442850, CCDC-1442851, and CCDC-1430302 contain the supplementary crystallographic data for this paper. The data can be obtained free of charge from *The Cambridge Crystallographic Data Centre* via [www.ccdc.cam.ac.uk/data\\_request/cif](http://www.ccdc.cam.ac.uk/data_request/cif).

Table S 1. Crystal data and refinement details for **2bH<sub>3</sub>**, **3bH<sub>1</sub>**, **4bH<sub>1</sub>**, and **3a**.

| compound                                                                             | <b>2bH<sub>3</sub></b>                                                        | <b>3bH<sub>1</sub></b>                                                              | <b>4bH<sub>1</sub></b>                                                        | <b>3a</b>                                                                       |
|--------------------------------------------------------------------------------------|-------------------------------------------------------------------------------|-------------------------------------------------------------------------------------|-------------------------------------------------------------------------------|---------------------------------------------------------------------------------|
| empirical formula                                                                    | C <sub>45</sub> H <sub>38</sub> Cu <sub>2</sub> N <sub>6</sub> O <sub>5</sub> | C <sub>23.50</sub> H <sub>22.50</sub> Cu <sub>2</sub> N <sub>6</sub> O <sub>9</sub> | C <sub>47</sub> H <sub>38</sub> Cu <sub>2</sub> N <sub>6</sub> O <sub>7</sub> | C <sub>23</sub> H <sub>32</sub> Br <sub>2</sub> CuN <sub>6</sub> O <sub>4</sub> |
| formula weight                                                                       | 869.89                                                                        | 660.05                                                                              | 925.91                                                                        | 679.90                                                                          |
| <i>T</i> [K]                                                                         | 133(2)                                                                        | 133(2)                                                                              | 133(2)                                                                        | 133(2)                                                                          |
| crystal size [mm <sup>3</sup> ]                                                      | 0.500×0.200×0.160                                                             | 0.35×0.2×0.09                                                                       | 0.246×0.23×0.086                                                              | 0.500×0.500×0.070                                                               |
| crystal system                                                                       | orthorhombic                                                                  | triclinic                                                                           | triclinic                                                                     | monoclinic                                                                      |
| space group                                                                          | <i>P</i> 2 <sub>1</sub> 2 <sub>1</sub> 2 <sub>1</sub>                         | <i>P</i> -1                                                                         | <i>P</i> -1                                                                   | <i>P</i> 2 <sub>1</sub> / <i>n</i>                                              |
| <i>a</i> [Å]                                                                         | 15.2115(3)                                                                    | 8.8934(18)                                                                          | 11.231(2)                                                                     | 13.241(3)                                                                       |
| <i>b</i> [Å]                                                                         | 16.7551(4)                                                                    | 10.975(2)                                                                           | 12.002(2)                                                                     | 13.767(3)                                                                       |
| <i>c</i> [Å]                                                                         | 19.9050(4)                                                                    | 13.212(3)                                                                           | 15.218(3)                                                                     | 29.787(6)                                                                       |
| $\alpha$ [°]                                                                         | 90                                                                            | 79.75(3)                                                                            | 98.67(3)                                                                      | 90                                                                              |
| $\beta$ [°]                                                                          | 90                                                                            | 80.08(3)                                                                            | 97.62(3)                                                                      | 94.56(3)                                                                        |
| $\gamma$ [°]                                                                         | 90                                                                            | 84.89(3)                                                                            | 95.17(3)                                                                      | 90                                                                              |
| <i>V</i> [Å <sup>3</sup> ]                                                           | 5073.19(19)                                                                   | 1247.6(5)                                                                           | 1997.3(7)                                                                     | 5412.4(19)                                                                      |
| <i>Z</i>                                                                             | 4                                                                             | 2                                                                                   | 2                                                                             | 8                                                                               |
| $\rho$ [g/cm <sup>3</sup> ]                                                          | 1.139                                                                         | 1.757                                                                               | 1.540                                                                         | 1.669                                                                           |
| <i>F</i> (000)                                                                       | 1792                                                                          | 671                                                                                 | 952                                                                           | 2744                                                                            |
| $\mu$ [mm <sup>-1</sup> ]                                                            | 0.882                                                                         | 1.772                                                                               | 1.128                                                                         | 3.800                                                                           |
| <i>T</i> <sub>min</sub> / <i>T</i> <sub>max</sub>                                    | 0.6961 / 0.9033                                                               | 0.6297 / 0.8408                                                                     | 0.7367 / 0.8794                                                               | 0.2825 / 0.5520                                                                 |
| $\theta$ -range [°]                                                                  | 1.589 - 25.679                                                                | 1.587 - 26.732                                                                      | 1.369 - 26.742                                                                | 1.372 - 25.639                                                                  |
| <i>hkl</i> -range                                                                    | ±18, ±20, -24 - 23                                                            | ±11, ±13, -14 - 16                                                                  | ±14, ±15, -19 - 18                                                            | ±16, ±16, ±36                                                                   |
| measured refl.                                                                       | 59629                                                                         | 13815                                                                               | 25763                                                                         | 59871                                                                           |
| unique refl. [ <i>R</i> <sub>int</sub> ]                                             | 9580 [0.0831]                                                                 | 5294 [0.0425]                                                                       | 8463 [0.0795]                                                                 | 10199 [0.1472]                                                                  |
| observed refl. ( <i>I</i> > 2 $\sigma$ ( <i>I</i> ))                                 | 8583                                                                          | 4522                                                                                | 6357                                                                          | 8263                                                                            |
| data / restraints / param.                                                           | 9580 / 3 / 528                                                                | 10199 / 0 / 669                                                                     | 5294 / 26 / 390                                                               | 8463 / 3 / 571                                                                  |
| goodness-of-fit ( <i>F</i> <sup>2</sup> )                                            | 0.987                                                                         | 1.096                                                                               | 1.032                                                                         | 0.943                                                                           |
| <i>R</i> <sub>1</sub> , <i>wR</i> <sub>2</sub> ( <i>I</i> > 2 $\sigma$ ( <i>I</i> )) | 0.0358, 0.0835                                                                | 0.0624, 0.1585                                                                      | 0.0416, 0.1088                                                                | 0.0421, 0.1009                                                                  |
| <i>R</i> <sub>1</sub> , <i>wR</i> <sub>2</sub> (all data)                            | 0.0410, 0.0853                                                                | 0.0773, 0.1671                                                                      | 0.0497, 0.1130                                                                | 0.0610, 0.1071                                                                  |
| resid. el. dens. [e/Å <sup>3</sup> ]                                                 | -0.294 / 0.362                                                                | -1.341 / 1.376                                                                      | -1.095 / 0.517                                                                | -0.627 / 0.903                                                                  |

Table S 2. Selected bond lengths [ $\text{\AA}$ ] and angles [ $^\circ$ ] for **3a**·3MeOH.

| Atoms            | <b>3a</b> ·3MeOH |                   | <b>3a</b> 3MeOH |
|------------------|------------------|-------------------|-----------------|
| Cu(1)–N(1)       | 1.973(5)         | Cu(2)–N(14)       | 1.971(5)        |
| Cu(1)–N(4)       | 1.984(5)         | Cu(2)–N(11)       | 1.982(5)        |
| Cu(1)–N(6)       | 2.022(5)         | Cu(2)–N(13)       | 2.033(5)        |
| Cu(1)–N(3)       | 2.045(5)         | Cu(2)–N(16)       | 2.038(5)        |
| Cu(1)–Br(1)      | 2.6748(9)        | Cu(2)–Br(2)       | 2.6749(9)       |
| Cu(1)–O(21)      | 2.826(4)         | Cu(1)–O(31)       | 2.978(4)        |
| N(1)–Cu(1)–N(4)  | 99.53(19)        | N(14)–Cu(2)–N(11) | 99.88(19)       |
| N(1)–Cu(1)–N(6)  | 163.47(16)       | N(14)–Cu(2)–N(13) | 162.61(17)      |
| N(4)–Cu(1)–N(6)  | 82.26(19)        | N(11)–Cu(2)–N(13) | 82.21(19)       |
| N(1)–Cu(1)–N(3)  | 82.01(19)        | N(14)–Cu(2)–N(16) | 81.41(19)       |
| N(4)–Cu(1)–N(3)  | 161.97(16)       | N(11)–Cu(2)–N(16) | 158.32(17)      |
| N(6)–Cu(1)–N(3)  | 91.30(18)        | N(13)–Cu(2)–N(16) | 90.36(18)       |
| N(1)–Cu(1)–Br(1) | 95.59(11)        | N(14)–Cu(2)–Br(2) | 94.12(12)       |
| N(4)–Cu(1)–Br(1) | 94.66(12)        | N(11)–Cu(2)–Br(2) | 92.86(12)       |
| N(6)–Cu(1)–Br(1) | 100.66(12)       | N(13)–Cu(2)–Br(2) | 103.04(11)      |
| N(3)–Cu(1)–Br(1) | 103.09(11)       | N(16)–Cu(2)–Br(2) | 108.69(12)      |

Table S 3. Selected bond lengths [ $\text{\AA}$ ] and angles [ $^\circ$ ] for **2bH<sub>3</sub>**, **3bH<sub>1</sub>**, and **4bH<sub>1</sub>**.

| Atoms  | <b>2bH<sub>3</sub></b> | <b>3bH<sub>1</sub></b> | <b>4bH<sub>1</sub></b> |
|--------|------------------------|------------------------|------------------------|
| Cu1-O1 | 1.968(2)               | 1.985(2)               | 1.970(2)               |
| Cu1-O2 | 1.934(3)               | 1.964(2)               | 1.948(2)               |
| Cu1-N1 | 1.940(3)               | 1.954(3)               | 1.958(2)               |
| Cu1-N2 | 2.016(3)               | 2.020(3)               | 2.056(2)               |
| Cu1-O4 | 2.293(3)               | 2.152(2)               | 2.208(2)               |
| Cu2-O1 | 1.968(2)               | 1.967(2)               | 1.9589(19)             |
| Cu2-N4 | 1.932(3)               | 1.942(2)               | 1.939(2)               |
| Cu2-O3 | 1.920(3)               | 1.933(2)               | 1.950(2)               |
| Cu2-N5 | 1.991(3)               | 2.005(3)               | 2.029(2)               |
| Cu2-O6 |                        | 2.354(12)              | 2.220(3)               |
| Cu2-O5 | 2.270(3)               |                        |                        |

b) Hydrogen Bond Network

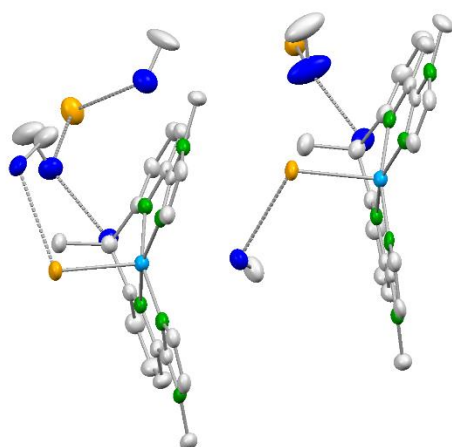

Figure S 1. Hydrogen bond network in the solid state structure of **3a**·3MeOH; bromine atoms are depicted in yellow, nitrogen atoms in green, oxygen atoms in blue, carbon atoms in grey and copper atoms in light blue.

Table S 4. Hydrogen bonds for **3a**-3MeOH [ $\text{\AA}$ ] and [ $^\circ$ ].

| D-H...A               | d(D-H) | d(H...A) | d(D...A) | <(DHA) |
|-----------------------|--------|----------|----------|--------|
| O(1)-H(1)...O(43)     | 0.84   | 1.87     | 2.680(8) | 163.0  |
| O(21)-H(21)...Br(2)#1 | 0.84   | 2.42     | 3.248(5) | 171.0  |
| O(31)-H(31)...Br(1)#2 | 0.84   | 2.52     | 3.324(5) | 161.3  |
| O(41)-H(41)...Br(3)   | 0.84   | 2.45     | 3.290(6) | 173.0  |
| O(42)-H(42)...Br(3)   | 0.84   | 2.39     | 3.202(5) | 162.4  |
| O(43)-H(43)...Br(4)   | 0.84   | 2.34     | 3.144(6) | 159.5  |
| O(44)-H(44)...Br(4)   | 0.84   | 2.38     | 3.216(7) | 172.7  |

Symmetry transformations used to generate equivalent atoms: #1  $-x+1, -y+1, -z+1$  #2  $-x+2, -y+1, -z+1$ .

### 3) $pK_a$ -Determinations of the Ligands

#### a) Potentiometric Determinations of the $pK_a$ of $L^2$ and $L^3$

Triplicate titrations of the free ligands ( $L^2$ : 195-259;  $L^3$ : 289-436 points) were carried out. The ligand concentration was 2.0 mM in all titrations. HYPERQUAD2008<sup>[8]</sup> computer programmes that use non-linear least square methods<sup>[9]</sup> were applied to calculate the stability constants. The distribution curves of the protonated species of  $L^2$  and  $L^3$ , respectively, as a function of pH were calculated using the HySS2009 programme.<sup>[10]</sup> The results of the fitting procedure are shown in Table S 5.

Table S 5. Overall protonation constants of the ligands  $L^2$  and  $L^3$  stability constants  $\log \beta$  and proton dissociation constants  $pK_a$  at 25.0(2)  $^\circ\text{C}$ . Solvent: MeOH/water 80/20 by weight,  $I = 0.1 \text{ M KCl}$ . Standard deviations of calculated values are given in parentheses, charges are omitted for clarity.

| ligand                  | $L^2$   | $L^3$    |
|-------------------------|---------|----------|
| $\log \beta$ (HL)       | 4.45(5) | 5.31(9)  |
| $\log \beta$ ( $H_2L$ ) | 7.70(4) | 9.63(8)  |
| $\log \beta$ ( $H_3L$ ) | 9.44(5) | 12.08(9) |
| $pK_a$ (HL)             | 4.45    | 5.31     |
| $pK_a$ ( $H_2L$ )       | 3.25    | 4.32     |
| $pK_a$ ( $H_3L$ )       | 1.74    | 2.45     |

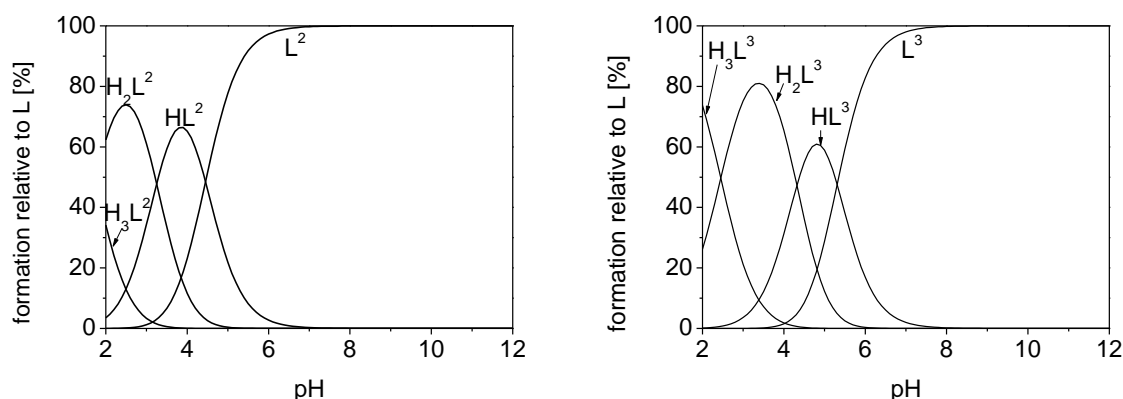

Figure S 2. Species distribution of the  $L^2$ - (left) and  $L^3$ -system (right).  $[L] = 2.0 \text{ mM}$ . Solvent: MeOH/water 80/20 by weight;  $I = 0.1 \text{ M KCl}$ . Charges are omitted for clarity.

b) Spectrophotometric Titrations for the Determination of the  $pK_a$  of  $L^4$

$L^4$  was dissolved in 0.1 M KCl solution (MeOH/water 80/20 by weight). The pH was adjusted to pH~2 by addition of 0.1 M HCl. Aliquots of KOH (dissolved in MeOH/water 80/20 by weight) were added. The data were fitted by using *Spectfit*<sup>TM</sup>.<sup>[11]</sup> The model and input parameters are shown in Table S 6.

Table S 6 Model and input parameters for  $L^4$ , values marked with asterisks have been obtained by fitting. Charges are omitted for clarity.

| species<br>[ $M_x(L)_yH_z$ ] | coloured | spectra<br>fixed | value fixed | parameter | error |
|------------------------------|----------|------------------|-------------|-----------|-------|
| 0 1 0 = $L^4$                | True     | False*           | True        | 0.0       | 0.0   |
| 0 1 1 = $HL^4$               | True     | False*           | False       | 6.46      | 0.07  |
| 0 1 2 = $H_2L^4$             | True     | False*           | False       | 9.82      | 0.08  |

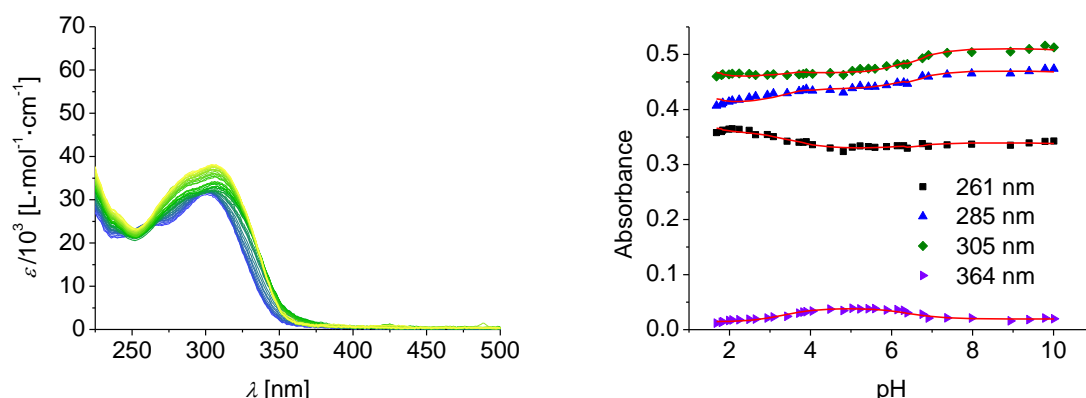

Figure S 3. Left: pH-dependent UV/Vis spectra  $L^4$  in MeOH/water (80/20 by weight), right: trend of the absorbance at four different wavelengths (261, 285, 305 and 364 nm), the red lines represent the fits;  $I = 0.1$  M KCl,  $[L^4] = 15 \mu M$ .

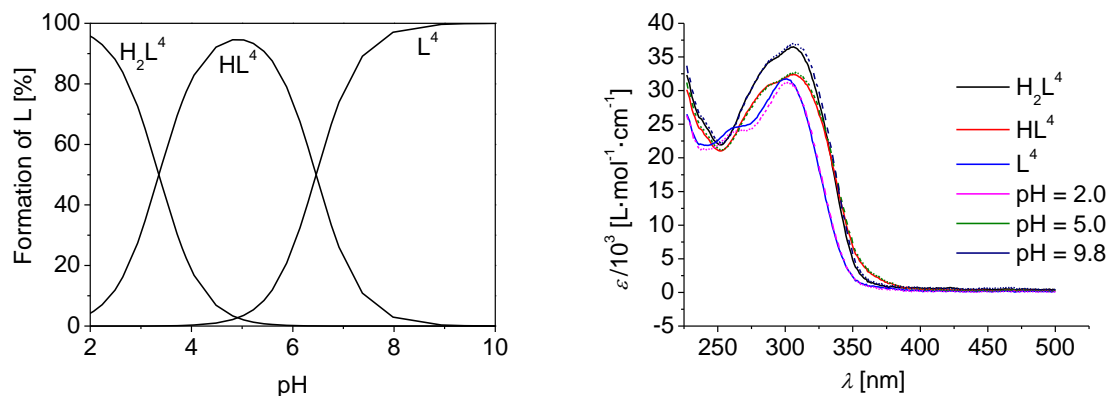

Figure S 4. Left: Species distribution of the  $L^4$ -system in MeOH/water (80/20 by weight), right: simulated and measured spectra of  $L^4$  at different protonation states.  $I = 0.1$  M KCl,  $[L^4] = 15 \mu M$ . Charges are omitted for clarity.

#### 4) Spectrophotometric Titrations

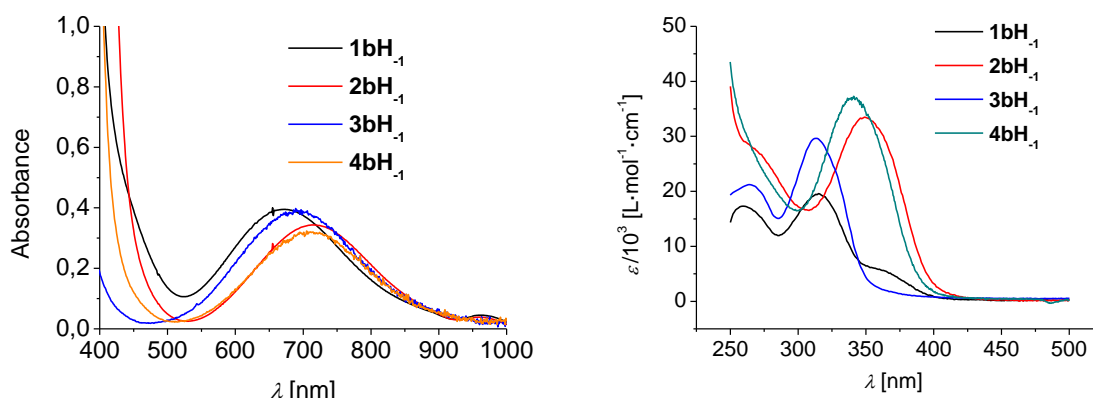

Figure S 5. Representative Vis spectra (left) and UV spectra (right) of the dinuclear copper(II) complexes **1bH<sub>-1</sub>**, **2bH<sub>-1</sub>**, **3bH<sub>-1</sub>**, and **4bH<sub>-1</sub>** in MeOH/water (80/20 by weight).  $I = 0.1$  M NaOAc.

Table S 7. Overview of the UV bands of the  $[\text{Cu}_2\text{LH}_{-1}]^{3+}$  complexes in MeOH/water.

| $\lambda$ ( $\epsilon/10^3$ )<br>[nm ( $\text{M}^{-1}\text{cm}^{-1}$ )] | <b>1bH<sub>-1</sub></b> | <b>2bH<sub>-1</sub></b> | <b>3bH<sub>-1</sub></b> | <b>4bH<sub>-1</sub></b> |
|-------------------------------------------------------------------------|-------------------------|-------------------------|-------------------------|-------------------------|
| ILCT                                                                    | 263 (17)                | 269(28)                 | 265 (21)                |                         |
| ILCT                                                                    | 313(20)                 | 350 (33)                | 314 (30)                | 335(32)                 |
| ILCT                                                                    | 356 (6)                 |                         |                         |                         |

##### a) Species Distributions of the $\text{L}^{1-4}\text{-Cu(II)}$ Systems in MeOH/Water

The complexes were dissolved in 0.1 M NaOAc solutions (MeOH/water 80/20 by weight). The pH was adjusted to pH~12 by addition of KOH. Aliquots of HOAc (dissolved in MeOH/water 80/20 by weight) were added. The pH values were measured by a combined glass electrode (Metrohm 6.0234.100) filled with 0.1 M NaCl solution in MeOH/water (80/20 by weight). The data were fitted by using *Spectfit*<sup>TM</sup>.<sup>[11]</sup> The model and input parameters are shown in Table S 8-S 11.

##### i) Complex **3bH<sub>-1</sub>**

Table S 8. Model and input parameters for the  $\text{CuL}^3$ -system, values marked with asterisks have been obtained by fitting. Charges are omitted for clarity.

| Species<br>[ $\text{M}_x(\text{L})_y\text{H}_z$ ] | coloured | spectra<br>fixed | value fixed | parameter | error |
|---------------------------------------------------|----------|------------------|-------------|-----------|-------|
| 1 0 0 = Cu                                        | False    | False            | True        | 0.0       | 0.0   |
| 0 1 0 = $\text{L}^3$                              | True     | True             | True        | 0.0       | 0.0   |
| 0 1 1 = $\text{HL}^3$                             | True     | True             | True        | 5.31      | 0.0   |
| 0 1 2 = $\text{H}_2\text{L}^3$                    | True     | True             | True        | 9.63      | 0.0   |
| 1 1 0 = <b>3a</b>                                 | True     | True             | False*      | 7.17*     | 0.08* |
| 2 1 -1 = <b>3bH<sub>-1</sub></b>                  | True     | False*           | False*      | 6.84*     | 0.10* |
| 2 1 -2 = <b>3bH<sub>-2</sub></b>                  | True     | False*           | False*      | -4.60 *   | 0.14* |

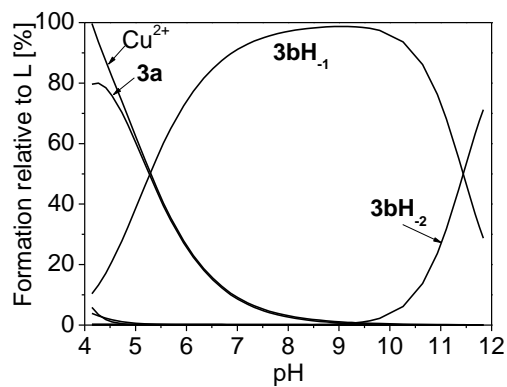

Figure S 6. Species distribution of the  $\text{CuL}^3$ -system in dependence of pH ( $c = 25 \mu\text{M}$ ); conditions: MeOH/water (80/20 by weight),  $I = 0.1 \text{ M NaOAc}$ .

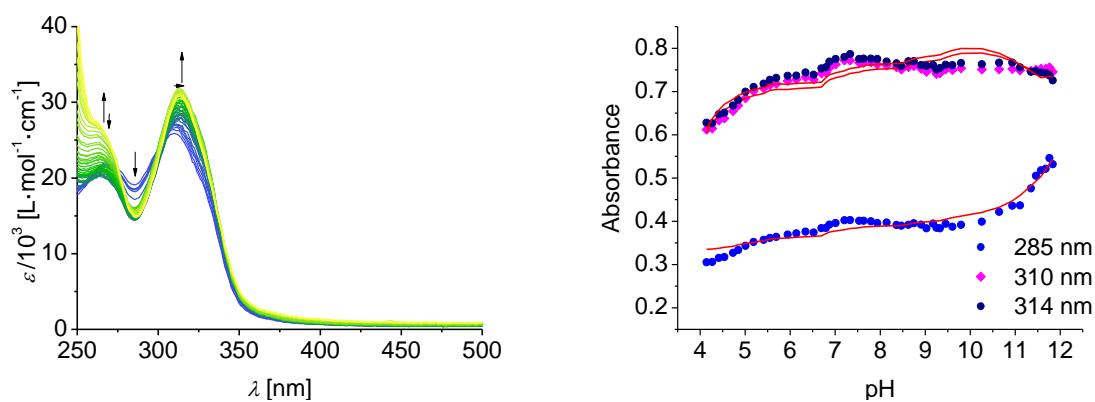

Figure S 7. Left: pH-dependent UV/Vis spectra of  $3bH_{-1}$  in MeOH/water (80/20 by weight), right: trend of the absorbance at three different wavelengths (285, 310, and 314 nm), the red lines represent the fits;  $I = 0.1 \text{ M NaOAc}$ ,  $[3bH_{-1}] = 25 \mu\text{M}$ .

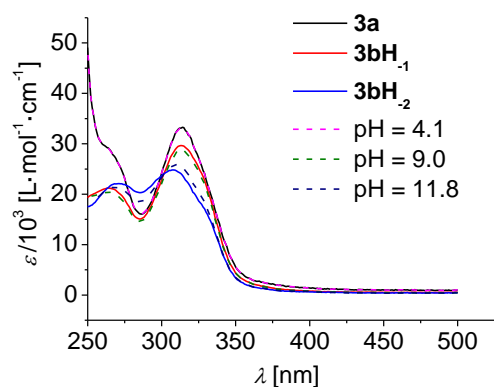

Figure S 8. Simulated and measured spectra of the  $\text{CuL}^3$ -system at different protonation states. Charges are omitted for clarity.  $I = 0.1 \text{ M NaOAc}$ ,  $[3bH_{-1}] = 25 \mu\text{M}$ .

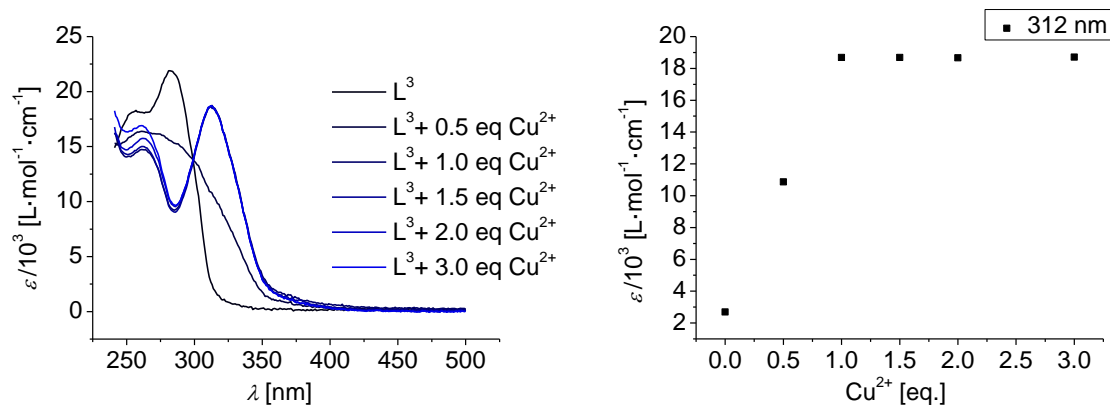

Figure S 9. Left: UV/Vis spectra of  $L^3$  upon adding  $Cu^{2+}$  ions in MeOH/water (80/20 by weight); right: trend of the absorbance at 312 nm;  $I = 0.1$  M NaOAc,  $pH = 3.9$ ,  $[L^3] = 25$   $\mu$ M.

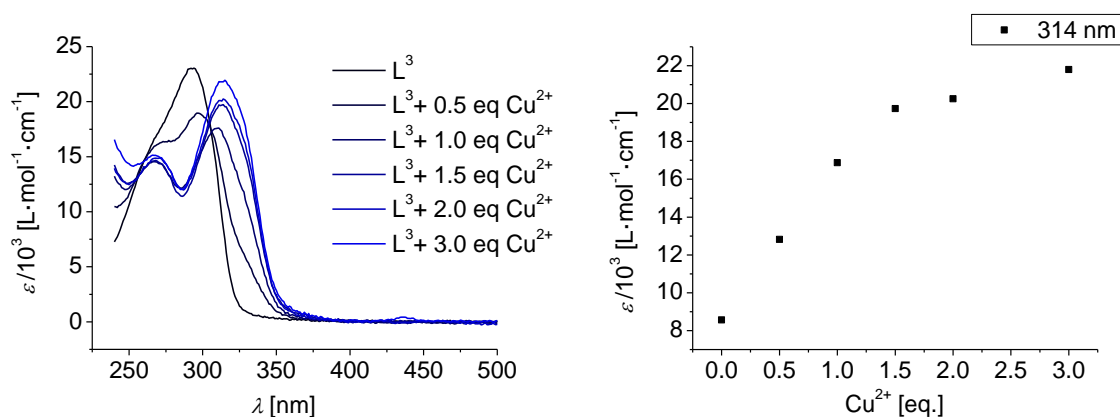

Figure S 10. Left: UV/Vis spectra of  $L^3$  upon adding  $Cu^{2+}$  ions in MeOH/water (80/20 by weight); right: trend of the absorbance at 314 nm;  $I = 0.1$  M NaOAc,  $pH = 10.7$ ,  $[L^3] = 25$   $\mu$ M.

## ii) Complex **4bH<sub>1</sub>**

Table S 9. Model and input parameters for the  $CuL^4$ -system, values marked with asterisks have been obtained by fitting. Charges are omitted for clarity.

| Species<br>[M <sub>x</sub> (L) <sub>y</sub> H <sub>z</sub> ] | coloured | spectra<br>fixed | value fixed | parameter           | error                  |
|--------------------------------------------------------------|----------|------------------|-------------|---------------------|------------------------|
| 1 0 0 = Cu                                                   | False    | False            | True        | 0.0                 | 0.0                    |
| 0 1 0 = L <sup>4</sup>                                       | True     | True             | True        | 0.0                 | 0.0                    |
| 0 1 1 = HL <sup>4</sup>                                      | True     | True             | True        | 6.46                | 0.0                    |
| 0 1 2 = H <sub>2</sub> L <sup>4</sup>                        | True     | True             | True        | 9.80                | 0.0                    |
| 2 1 0 = Cu <sub>2</sub> L <sup>4</sup>                       | True     | False            | False*      | 13.51 <sup>§*</sup> | 0.14 <sup>§</sup>      |
| 2 1 -1 = <b>4bH<sub>1</sub></b>                              | True     | False            | False*      | 5.86 <sup>§*</sup>  | 0.05/0.10 <sup>§</sup> |
| 2 1 -2 = <b>4bH<sub>2</sub></b>                              | True     | False            | False*      | -3.40 <sup>§*</sup> | 0.12 <sup>§</sup>      |

<sup>§</sup> We could not reach convergence, when all three values were fitted at once. Therefore we fitted the values iterative, that is the first two values were fitted while the third one was fixed, and then the other way around (i.e. the first value was fixed and the other two were fitted). The procedure was repeated till all values did not change any further upon fitting.

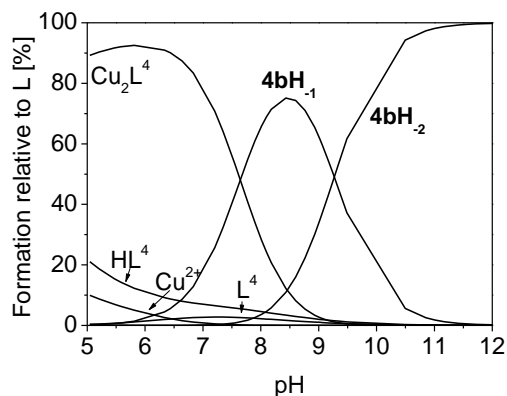

Figure S 11. Species distribution of the  $\text{CuL}^4$ -system in dependence of pH ( $c = 15 \mu\text{M}$ ); conditions: MeOH/water (80/20 by weight),  $I = 0.1 \text{ M NaOAc}$ . Charges are omitted for clarity.

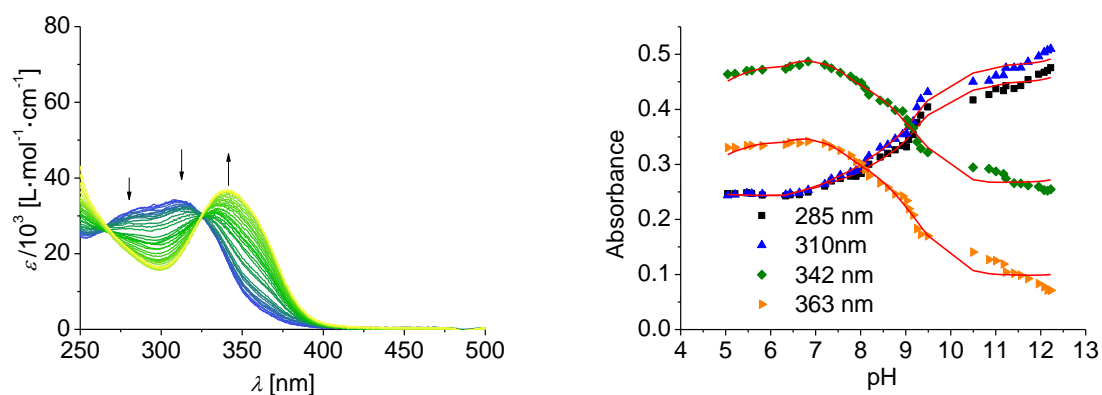

Figure S 12. Left: pH-dependent UV/Vis spectra of  $4\text{bH}_{-1}$  in MeOH/water (80/20 by weight), right: trend of the absorbance at four different wavelengths (285, 310, 342, and 363 nm), the red lines represent the fits;  $I = 0.1 \text{ M NaOAc}$ ,  $[4\text{bH}_{-1}] = 15 \mu\text{M}$ .

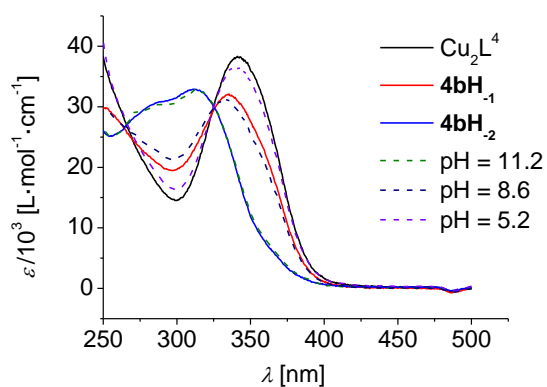

Figure S 13. Simulated and measured spectra of the  $\text{CuL}^4$ -system at different protonation states. Charges are omitted for clarity.  $I = 0.1 \text{ M NaOAc}$ ,  $[4\text{bH}_{-1}] = 15 \mu\text{M}$ .

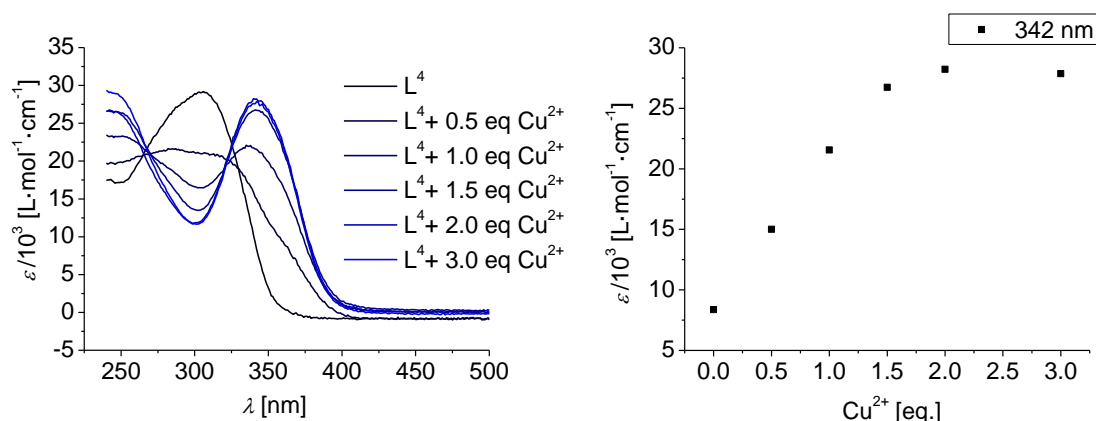

Figure S 14. Left: UV/Vis spectra of  $L^4$  upon adding  $Cu^{2+}$  ions in MeOH/water (80/20 by weight); right: trend of the absorbance at 342 nm;  $I = 0.1$  M NaOAc,  $pH = 4.4$ ,  $[L^4] = 15$   $\mu M$ .

### iii) Complex **1bH<sub>3</sub>**

Table S 10. Model and input parameters for the  $CuL^1$ -system, values marked with asterisks have been obtained by fitting. Charges are omitted for clarity.

| Species<br>[ $M_x(L)_yH_z$ ]    | coloured | spectra<br>fixed | value fixed | parameter | error |
|---------------------------------|----------|------------------|-------------|-----------|-------|
| 1 0 0 = Cu                      | False    | False            | True        | 0.0       | 0.0   |
| 0 1 0 = $L^1$                   | True     | True             | True        | 0.0       | 0.0   |
| 0 1 1 = $HL^1$                  | True     | True             | True        | 5.24      | 0.0   |
| 0 1 2 = $H_2L^1$                | True     | True             | True        | 9.31      | 0.0   |
| 1 1 0 = <b>1a</b>               | True     | True             | False*      | 7.67*     | 0.50* |
| 2 1 -1 = <b>1bH<sub>1</sub></b> | True     | False*           | False*      | 6.35*     | 0.51* |
| 2 1 -2 = <b>1bH<sub>2</sub></b> | True     | False*           | False*      | -1.41*    | 0.51* |
| 2 1 -3 = <b>1bH<sub>3</sub></b> | True     | True             | False*      | -11.96*   | 0.51* |

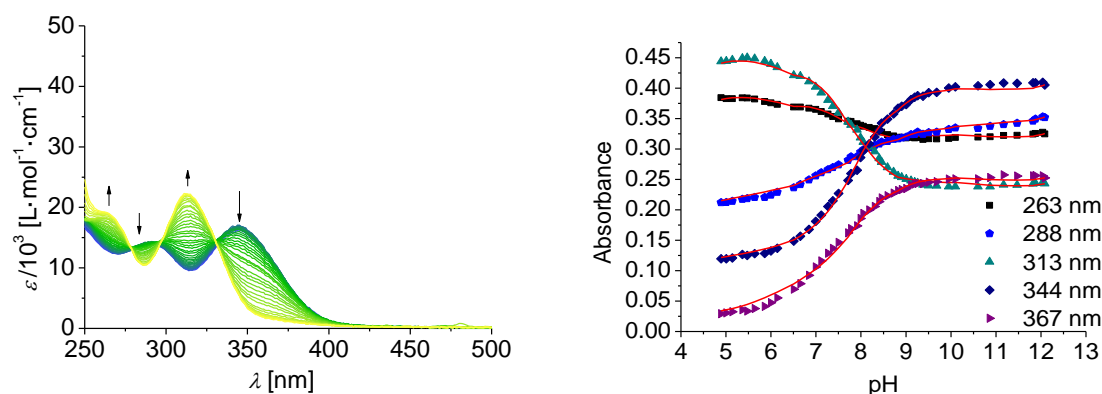

Figure S 15. Left: pH-dependent UV/Vis spectra of **1bH<sub>3</sub>** in MeOH/water (80/20 by weight), right: trend of the absorbance at five different wavelengths (263, 288, 313, 344, and 367 nm), the red lines represent the fits;  $I = 0.1$  M NaOAc,  $[1bH_3] = 25$   $\mu M$ .

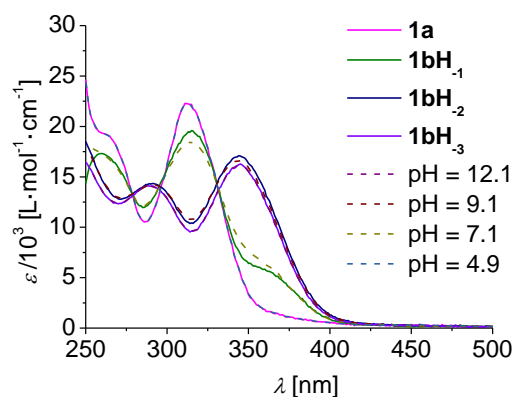

Figure S 16 Simulated and measured spectra of the  $\text{CuL}^1$ -system at different protonation states. Charges omitted for clarity.  $I = 0.1 \text{ M NaOAc}$ ,  $[1\text{bH}_{-3}] = 25 \text{ } \mu\text{M}$ .

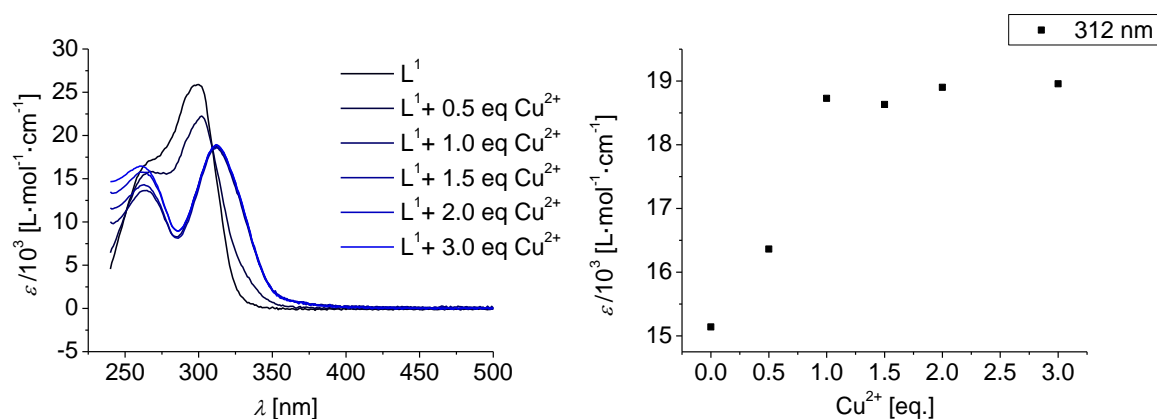

Figure S 17. Left: UV/Vis spectra of  $\text{L}^1$  upon adding  $\text{Cu}^{2+}$  ions in MeOH/water (80/20 by weight); right: trend of the absorbance at 312 nm;  $I = 0.1 \text{ M NaOAc}$ ,  $\text{pH} = 4.5$ ,  $[\text{L}^1] = 25 \text{ } \mu\text{M}$ .

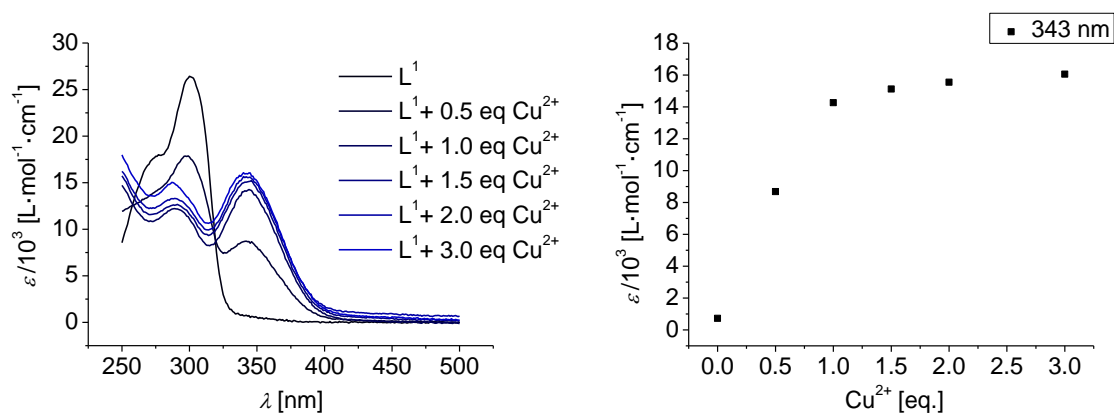

Figure S 18. Left: UV/Vis spectra of  $\text{L}^1$  upon adding  $\text{Cu}^{2+}$  ions in MeOH/water (80/20 by weight); right: trend of the absorbance at 343 nm;  $I = 0.1 \text{ M NaOAc}$ ,  $\text{pH} = 10.7$ ,  $[\text{L}^1] = 25 \text{ } \mu\text{M}$ .

iv) Complex **2bH<sub>3</sub>**

Table S 11. Model and input parameters for the CuL<sup>2</sup>-system, values marked with asterisks have been obtained by fitting. Charges are omitted for clarity.

| Species<br>[M <sub>x</sub> (L) <sub>y</sub> H <sub>z</sub> ] | coloured | spectra<br>fixed | value fixed | parameter | error |
|--------------------------------------------------------------|----------|------------------|-------------|-----------|-------|
| 1 0 0 = Cu                                                   | False    | False            | True        | 0.0       | 0.0   |
| 0 1 0 = L <sup>2</sup>                                       | True     | True             | True        | 0.0       | 0.0   |
| 0 1 0 = HL <sup>2</sup>                                      | True     | True             | True        | 4.45      | 0.0   |
| 0 1 1 = H <sub>2</sub> L <sup>2</sup>                        | True     | True             | True        | 7.70      | 0.0   |
| 1 1 0 = L <sup>2</sup> Cu                                    | True     | False*           | False*      | 6.42*     | 0.26* |
| 2 1 -1 = <b>2bH<sub>1</sub></b>                              | True     | True             | False*      | 7.00*     | 0.37* |
| 2 1 -2 = <b>2bH<sub>2</sub></b>                              | True     | True             | False*      | 0.23*     | 0.36* |
| 2 1 -3 = <b>2bH<sub>3</sub></b>                              | True     | False*           | False*      | -9.42*    | 0.37* |

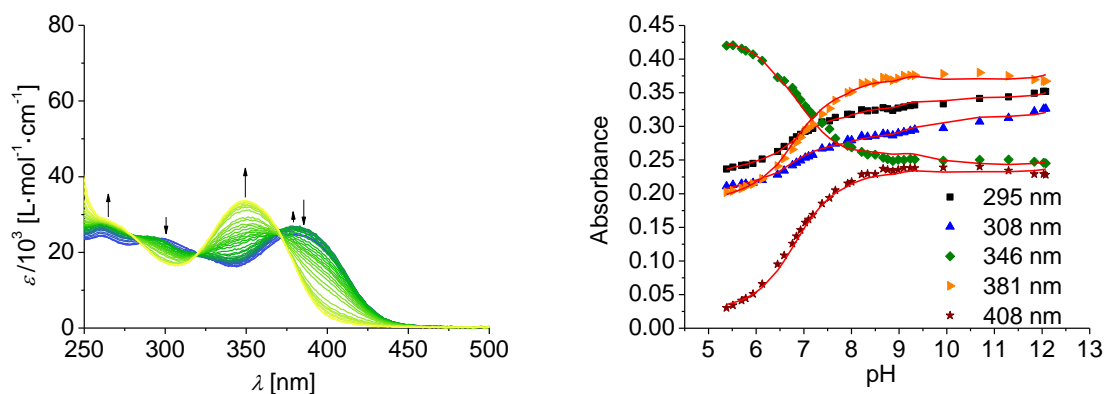

Figure S 19. Left: pH-dependent UV/Vis spectra of **2bH<sub>3</sub>** in MeOH/water (80/20 by weight), right: trend of the absorbance at five different wavelengths (295, 308, 346, 381, and 408 nm), the red lines represent the fits; *I* = 0.1 M NaOAc, [**2bH<sub>3</sub>**] = 15 μM.

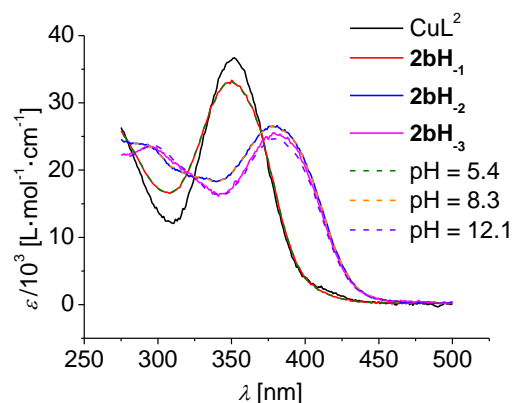

Figure S 20. Simulated and measured spectra of the CuL<sup>2</sup>-system at different protonation states. Charges are omitted for clarity. *I* = 0.1 M NaOAc, [**2bH<sub>3</sub>**] = 15 μM.

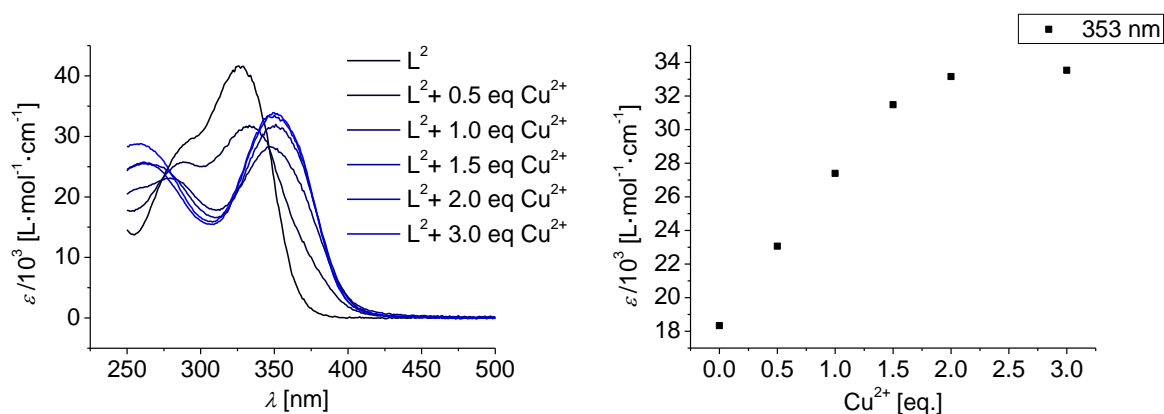

Figure S 21. Left: UV/Vis spectra of  $L^2$  upon adding  $Cu^{2+}$  ions in MeOH/water (80/20 by weight); right: trend of the absorbance at 353 nm;  $I = 0.1$  M NaOAc, pH = 4.5,  $[L^2] = 15 \mu M$ .

## b) Species Distributions in Water

### i) Employing $L^1$

The ligand was dissolved in 0.1 M aqueous phosphoric acid solution and the solution's pH was adjusted to pH  $\sim 2$  with KOH solution. Aliquots of KOH solution were added. The data were fitted by using *Spectfit*<sup>TM</sup>.<sup>[11]</sup> The model and input parameters are shown in Table S 12.

Table S 12. Model and input parameters for  $L^1$ , values marked with asterisks have been obtained by fitting. Charges are omitted for clarity.

| species<br>[ $M_x(L)_yH_z$ ] | coloured | spectra<br>fixed | value fixed | parameter | error    |
|------------------------------|----------|------------------|-------------|-----------|----------|
| 0 1 0 = $L^1H_{-1}$          | True     | False*           | True        | 0.0       | 0.0      |
| 0 1 1 = $L^1$                | True     | False*           | False       | 11.241*   | 0.04275* |
| 0 1 2 = $HL^1$               | True     | False*           | False       | 16.778*   | 0.05302* |
| 0 1 3 = $H_2L^1$             | True     | False*           | False       | 20.357*   | 0.1077*  |

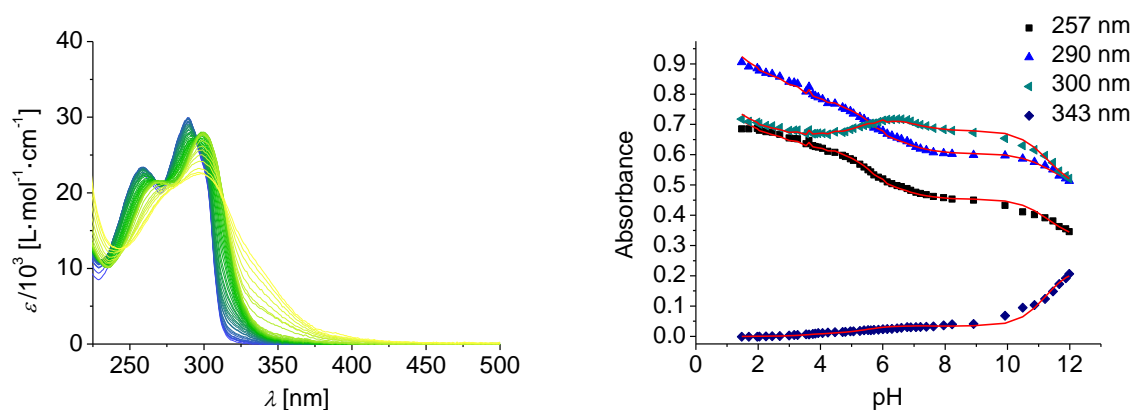

Figure S 22. Left: pH-dependent UV/Vis spectra  $L^1$  in water, right: trend of the absorbance at four different wavelength (257, 290, 300 and 343 nm; right), the red lines represent the fits;  $I = 0.1$  M  $PO_4^{3-}$ ,  $[L^1] = 31 \mu M$ .

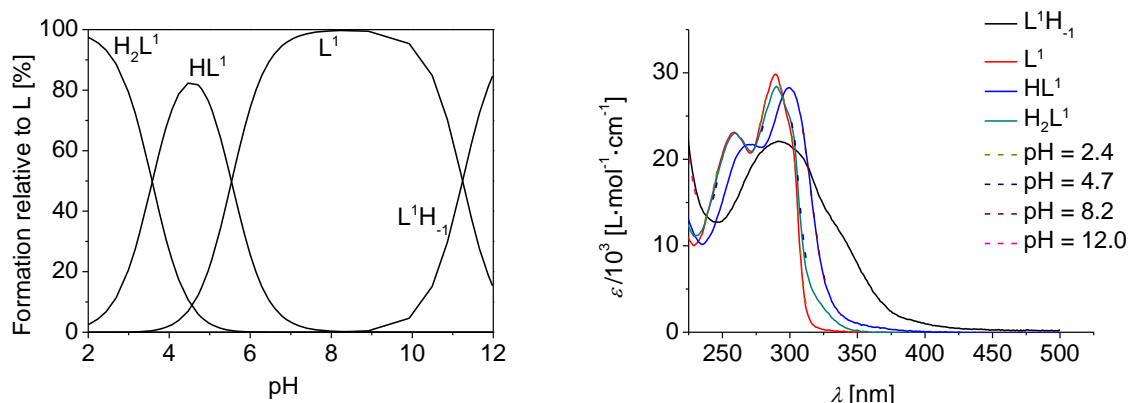

Figure S 23. Left: Species distribution of the  $L^1$ -system in water; right: simulated and measured spectra of  $L^1$  at different protonation states.  $I = 0.1 \text{ M PO}_4^{3-}$ ,  $[L^1] = 31 \text{ } \mu\text{M}$ . Charges are omitted for clarity.

$L^1$  was dissolved in 0.1 M aqueous phosphoric acid solution and the solution's pH was adjusted to pH = 2.5 with KOH solution. Aliquots of a  $\text{Cu}(\text{OTf})_2$  solution were added,  $c = 399 \text{ } \mu\text{M}$ . The data were fitted by using *Spectfit*<sup>TM</sup>.<sup>[11]</sup> The model and input parameters are shown in Table S 13.

Table S 13. Model and input parameters for the  $L^1$ - $\text{Cu}^{2+}$ -titration, values marked with asterisks have been obtained by fitting. Charges are omitted for clarity.

| species<br>[ $\text{M}_x(\text{L})_y\text{H}_z$ ] | coloured | spectra<br>fixed    | value fixed | parameter | error   |
|---------------------------------------------------|----------|---------------------|-------------|-----------|---------|
| 100 = Cu                                          | False    | False               | True        | 0.0       | 0.0     |
| 0 1 0 = $L^1\text{H}_{-1}$                        | True     | True <sup>[a]</sup> | True        | 0.0       | 0.0     |
| 0 1 1 = $L^1$                                     | True     | True <sup>[a]</sup> | True        | 11.24     | 0.0     |
| 0 1 2 = $\text{HL}^1$                             | True     | True <sup>[a]</sup> | True        | 16.78     | 0.0     |
| 0 1 3 = $\text{H}_2\text{L}^1$                    | True     | False*              | True        | 20.36     | 0.0     |
| 1 1 1 = <b>1a</b>                                 | True     | True                | False       | 23.308*   | 0.2176* |

<sup>[a]</sup>The calculated spectra from the ligand fit have been used as fixed spectra.

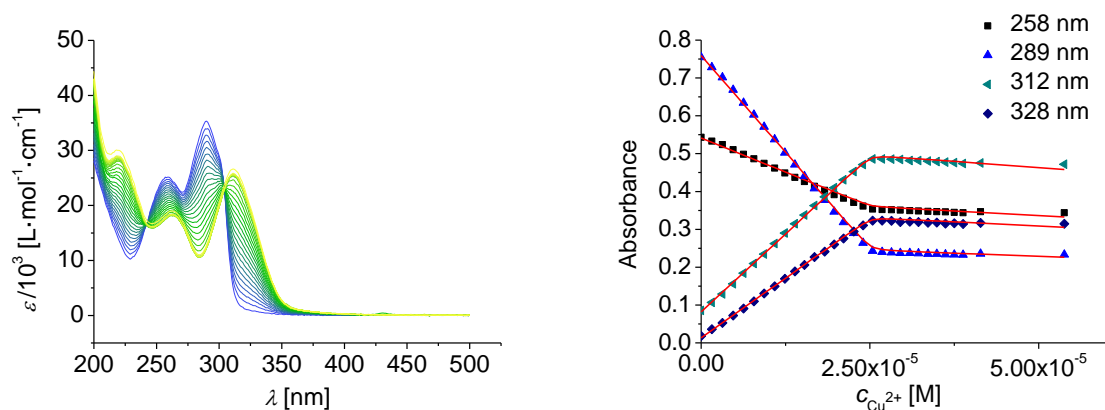

Figure S 24. Left: UV/Vis spectra of  $L^1$  upon adding  $\text{Cu}^{2+}$  ions in water; right: trend of the absorbance at four different wavelength (258, 289, 312, and 328 nm), the red lines represent the fits;  $I = 0.1 \text{ M PO}_4^{3-}$ , pH = 2.5,  $[L^1] = 26 \text{ } \mu\text{M}$ .

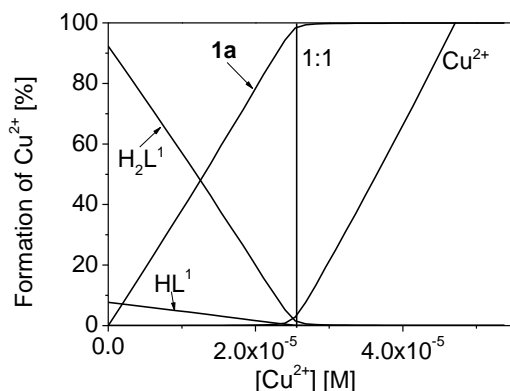

Figure S 25. Species distribution of  $L^1$  upon adding  $Cu^{2+}$  ions in water;  $I = 0.1 \text{ M } PO_4^{3-}$ ,  $pH = 2.5$ ,  $[L^1] = 26 \text{ } \mu\text{M}$ . Charges are omitted for clarity.

## ii) Employing $L^5$

The ligand was dissolved in 0.1 M aqueous phosphoric acid solution and the solution's pH was adjusted to  $pH \sim 1.7$  with KOH solution. Aliquots of KOH solution were added. The data were fitted by using *Spectfit*<sup>TM</sup>.<sup>[11]</sup> The model and input parameters are shown in Table S 14. We also employed a model with 2 protonation steps, but the fits were not reasonable. This in line with literature reports for similar ligands, in which also only one protonation step has been observed in the pH range of 2-11 (cf. 2,2'-bisimidazol  $pK_{a,1} = 5.185$ ,  $pK_{a,2} < 1$ ; 2,2'-bipyridine  $pK_{a,1} = 7.22$ ).<sup>[12]</sup>

Table S 14. Model and input parameters for  $L^5$ , values marked with an asterisk have been obtained by fitting. Charges are omitted for clarity.

| species<br>[ $M_x(L)_yH_z$ ] | coloured | spectra<br>fixed | value fixed | parameter | error    |
|------------------------------|----------|------------------|-------------|-----------|----------|
| 0 1 0 = $L^5$                | True     | False*           | True        | 0.0       | 0.0      |
| 0 1 1 = $HL^5$               | True     | False*           | False       | 5.75118*  | 0.03597* |

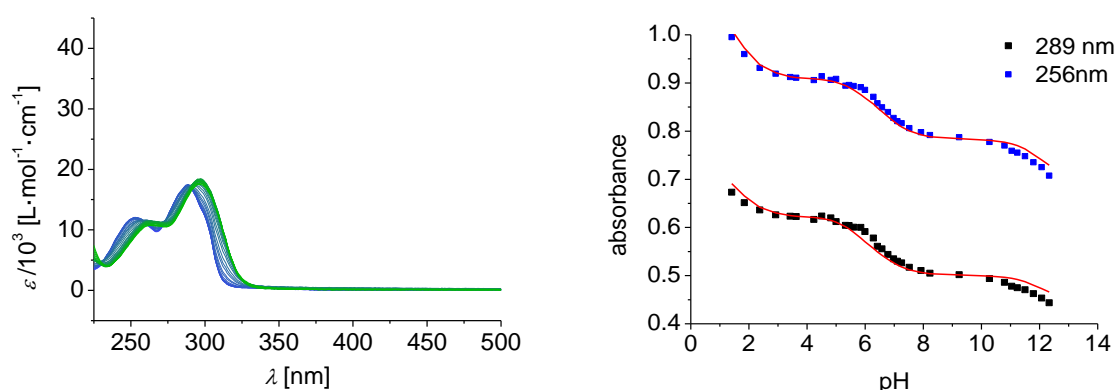

Figure S 26. Left: pH-dependent UV/Vis spectra  $L^5$  in water; right: trend of the absorbance at two different wavelength (256 nm and 289 nm), the red lines represent the fits;  $I = 0.1 \text{ M } PO_4^{3-}$ ,  $[L^5] = 30 \text{ } \mu\text{M}$ .

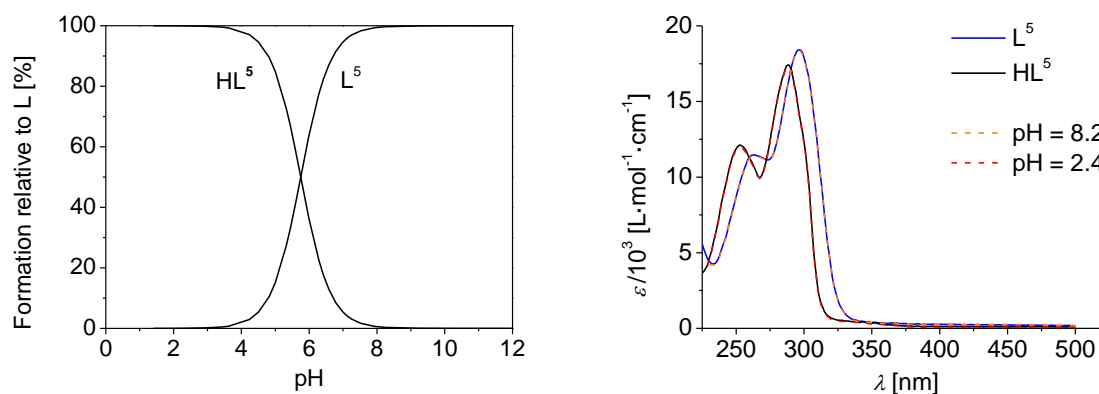

Figure S 27. Left: species distribution of the  $L^5$  system in water; right: simulated and measured spectra of  $L^5$  at different protonation states;  $I = 0.1 \text{ M PO}_4^{3-}$ ,  $[L^5] = 60 \mu\text{M}$ . Charges are omitted for clarity.

**5** was dissolved in 0.1 M phosphoric acid solution (water) and the solution's pH was adjusted to pH  $\sim 1.5$  with KOH solution. Aliquots of KOH solution were added. The data were fitted by using *Spectfit*<sup>TM</sup>.<sup>[11]</sup> The model and input parameters are shown in Table S 15.

The fit suggested that the complex is stable at pH = 2.5 and this would be in line with literature reports for the similar copper(II) complex  $[\text{Cu}(\text{bim})_n]$  (bim = 2,2'-bisimidazol, cf.  $[\text{Cu}(\text{bim})_1]$ :  $\log \beta = 6.22$ ,  $[\text{Cu}(\text{bim})_2]$ :  $\log \beta = 10.96$ , above pH of 6 deprotonation and precipitation)<sup>[13a]</sup> and to our observation that upon metal/ligand titration at pH = 2.5 small, reproducible changes occur. The complex stability constant is very similar to the one of  $[\text{CuL}^1]$ . However, there might be some doubts on the results, because (i) the standard deviation is high, (ii)  $\text{p}K_{a,1}$  of 4.7 is lower than the one obtained for the closely related complex  $[\text{Cu}(\text{impy})_3]$  (impy = 2,2'-imidazolepyridine, cf.  $\text{p}K_{a,1} = 7.9$ ,  $\text{p}K_{a,2} = 9.0$ ,  $\text{p}K_{a,2} = 11.3$ )<sup>[13]</sup>, and (iii) the complex stability constant of  $[\text{Cu}_2L^5]$  is higher than the one of  $[\text{Cu}(\text{bim})_2]$ <sup>[13a]</sup>. We cannot perform potentiometric studies for further investigation of the stability constants, because the solubility of the ligand is too low in water.

Table S 15. Model and input parameters for the  $\text{CuL}^5$ -system values marked with an asterisk have been obtained by fitting. Charges are omitted for clarity.

| species<br>[M <sub>x</sub> (L) <sub>y</sub> H <sub>z</sub> ] | coloured | spectra fixed | value fixed | parameter | error    |
|--------------------------------------------------------------|----------|---------------|-------------|-----------|----------|
| 1 0 0 = Cu <sup>2+</sup>                                     | False    |               | True        | 0         | 0        |
| 0 1 0 = L <sup>5</sup>                                       | True     | True          | True        | 0.0       | 0        |
| 0 1 1 = HL <sup>5</sup>                                      | True     | True          | True        | 5.75      | 0        |
| 1 1 0 = [CuL <sup>5</sup> ]                                  | True     | True          | False       | 9.34066*  | 1.68340* |
| 1 2 0 = <b>5</b>                                             | True     | False*        | False       | 22.0852*  | 1.44624* |
| 1 2 -1 = <b>5H</b> <sub>1</sub>                              | True     | False*        | False       | 17.3768*  | 1.44636* |
| 1 2 -2 = <b>5H</b> <sub>2</sub>                              | True     | False*        | False       | 8.39961*  | 1.44632* |

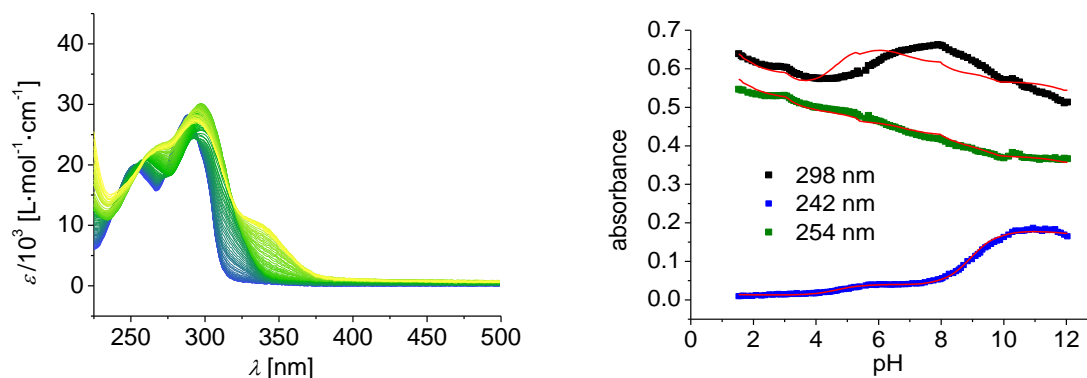

Figure S 28. Left: pH-dependent UV/Vis spectra of **5** in water; right: trend of the absorbance at three different wavelength (298 nm, 254 nm, and 254 nm), the red lines represent the fits;  $I = 0.1 \text{ M PO}_4^{3-}$ ,  $[\text{CuL}^5_2] = 30 \text{ }\mu\text{M}$ .

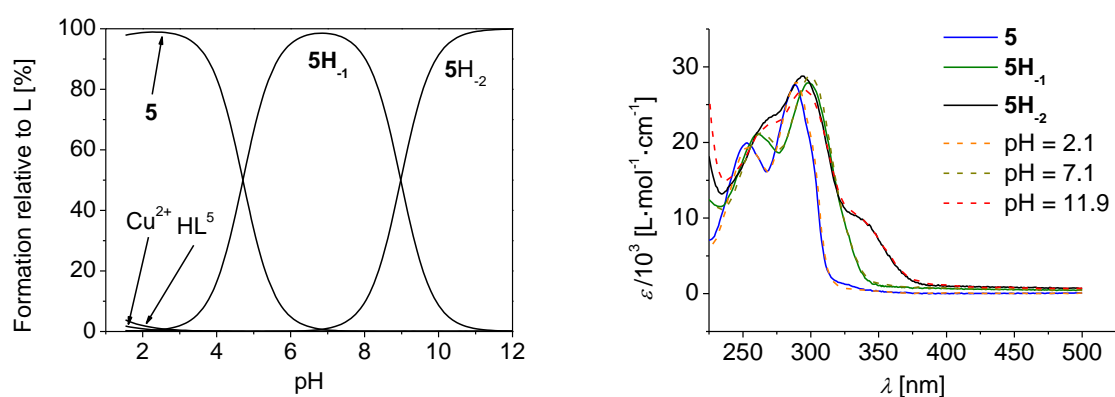

Figure S 29. Left: species distribution as calculated from the fit of the  $\text{CuL}^5$ -system in water; right: simulated and measured spectra of the  $\text{CuL}^5$ -system at different protonation states;  $I = 0.1 \text{ M PO}_4^{3-}$ ,  $[\text{CuL}^5_2] = 30 \text{ }\mu\text{M}$ . Charges are omitted for clarity.

## 5) Electrochemical Studies

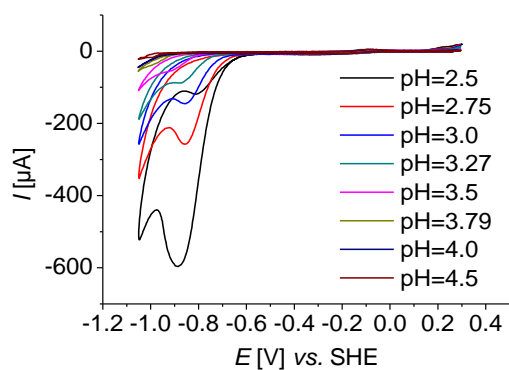

Figure S 30. pH-dependent CV measurements of **1a**,  $[\mathbf{1a}] = 1 \text{ mM}$ ,  $I = 0.1 \text{ M PO}_4^{3-}$ ,  $\text{pH} = 2.5$ , scan rate =  $100 \text{ mVs}^{-1}$ .

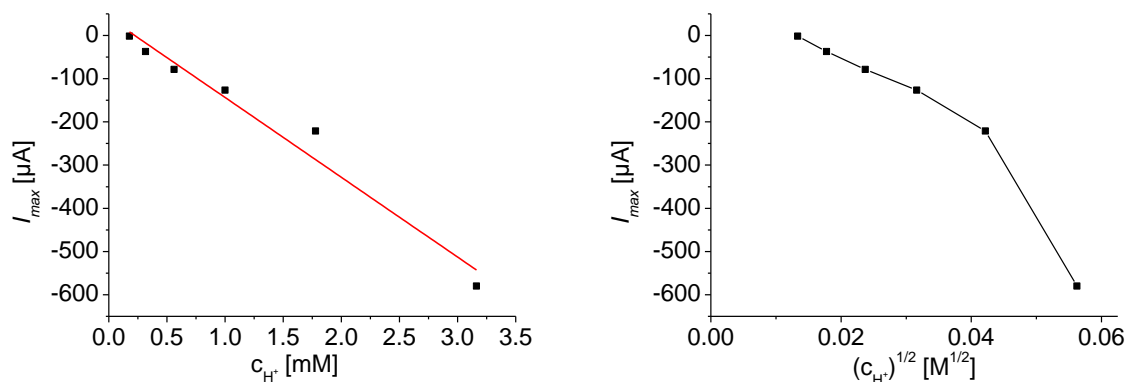

Figure S 31. Left: plot of the maximum current vs. proton concentration and the linear fit; right: plot of the maximum current vs. the square root of the proton concentration; conditions  $[\mathbf{1a}] = 1 \text{ mM}$ ,  $I = 0.1 \text{ M PO}_4^{3-}$ ,  $\text{pH} = 2.5$ , scan rate =  $100 \text{ mVs}^{-1}$ . A linear dependence of  $I_{max}$  on the proton concentration is indicative for second order kinetics, whereas a linear dependency of  $I_{max}$  on the square root of the proton concentration would imply first order kinetics.<sup>[14]</sup>

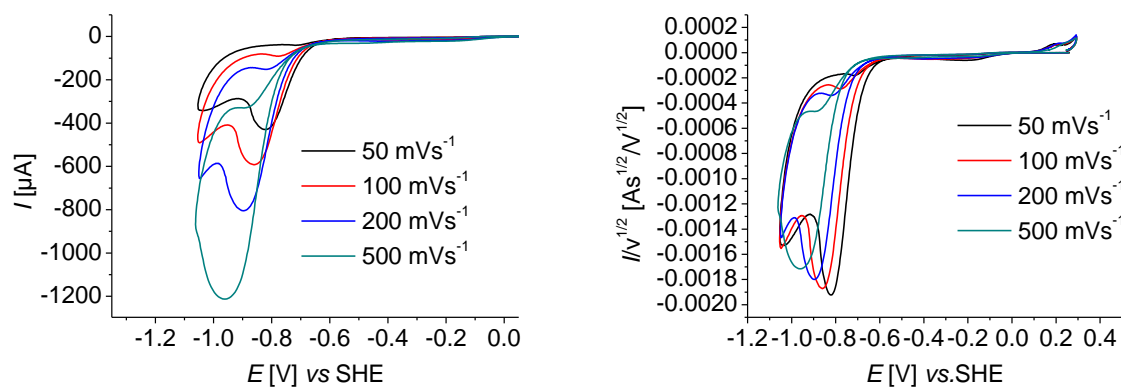

Figure S 32. Scan rate-dependent CV measurements of  $\mathbf{1a}$ , right: normalised plot ( $I/v^{1/2}$ );  $[\mathbf{1a}] = 1 \text{ mM}$ ,  $I = 0.1 \text{ M PO}_4^{3-}$ ,  $\text{pH} = 2.5$ .

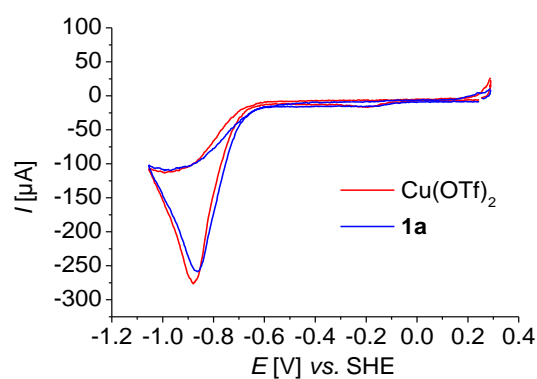

Figure S 33. CV measurements of  $\mathbf{1a}$  and  $\text{Cu}(\text{OTf})_2$  using sulphate buffer,  $c = 1 \text{ mM}$ ,  $I = 0.1 \text{ M SO}_4^{2-}$ ,  $\text{pH} = 2.5$ , scan rate =  $100 \text{ mVs}^{-1}$ .

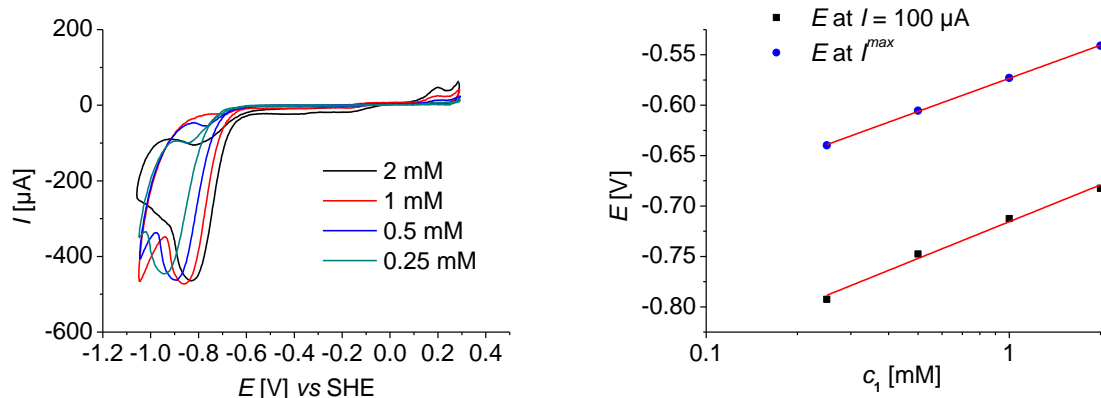

Figure S 34. Left: concentration-dependent CV measurements of **1a**, [**1a**] = see legend,  $I = 0.1 \text{ M PO}_4^{3-}$ ,  $\text{pH} = 2.5$ , scan rate =  $100 \text{ mVs}^{-1}$ ; right: logarithmic plot of the potential at  $I^{max}$  and at  $I = 100 \mu\text{A}$  vs. [**1a**].

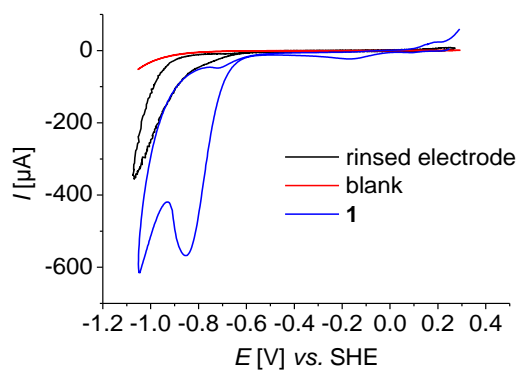

Figure S 35. Background of a copper free phosphate solution, representative cathodic scan, and scan of the electrode after 10 cathodic scans in a copper free phosphate solution;  $I = 0.1 \text{ M PO}_4^{3-}$ ,  $\text{pH} = 2.5$ , scan rate =  $100 \text{ mVs}^{-1}$ , [**1a**] =  $0.5 \text{ mM}$ .

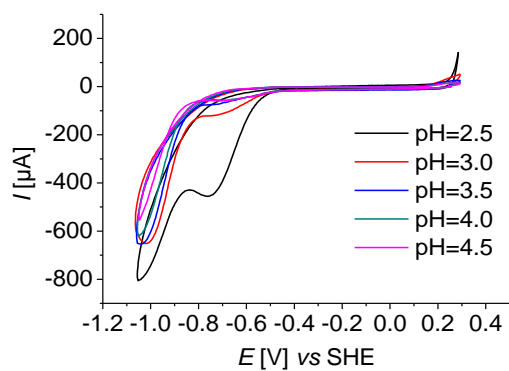

Figure S 36. pH-dependent CV measurements of a copper electrode;  $I = 0.1 \text{ M PO}_4^{3-}$ ,  $\text{pH} = 2.5$ , scan rate =  $100 \text{ mVs}^{-1}$ .

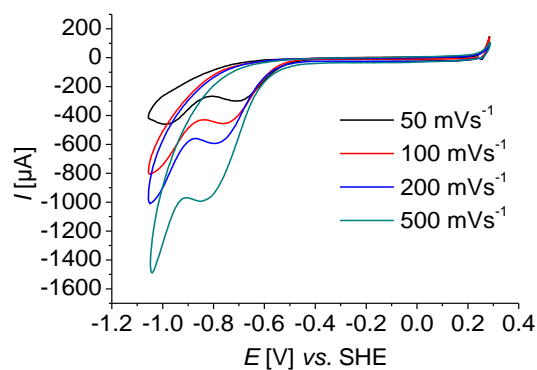

Figure S 37. Scan rate-dependent CV measurements of a copper electrode;  $I = 0.1 \text{ M PO}_4^{3-}$ ,  $\text{pH} = 2.5$ .

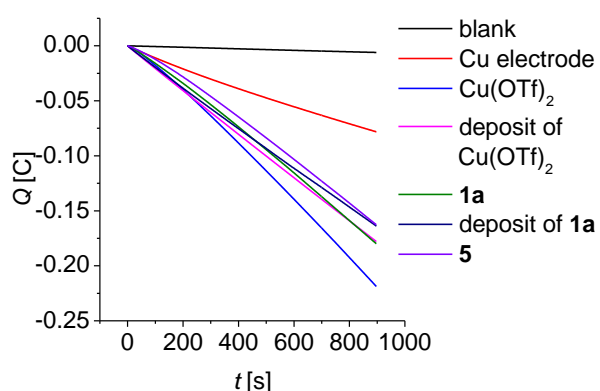

Figure S 38. CPE of **1a**, **5** and  $\text{Cu}(\text{OTf})_2$  and CPE in a copper free solution of the deposits from a CPE of **1a** and  $\text{Cu}(\text{OTf})_2$   $E^{\text{apI}} = -0.806 \text{ V}$ . The plot shows the charge build-up versus time;  $[c] = 0.5 \text{ mM}$ ,  $I = 0.1 \text{ M PO}_4^{3-}$ ,  $\text{pH} = 2.5$ .

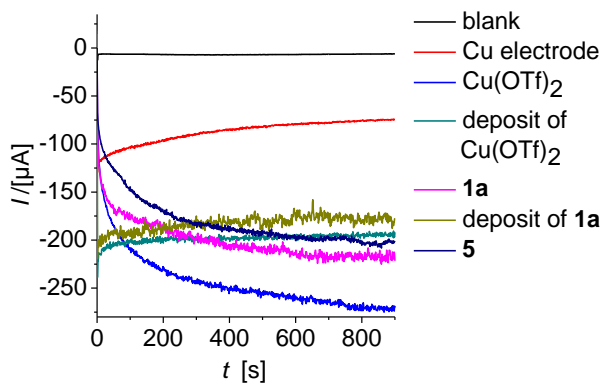

Figure S 39. Current vs. time plot for the CPE;  $E^{\text{apI}} = -0.806 \text{ V}$ ,  $[c] = 0.5 \text{ mM}$ ,  $I = 0.1 \text{ M PO}_4^{3-}$ ,  $\text{pH} = 2.5$ .

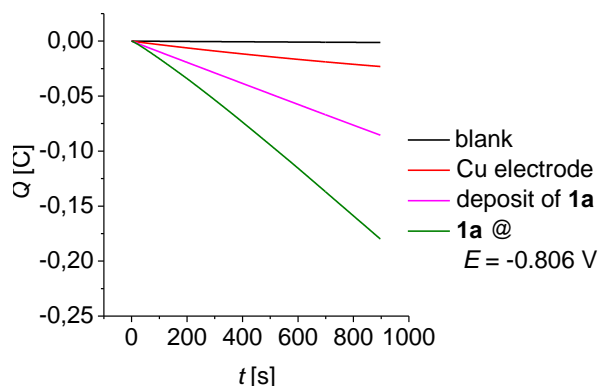

Figure S 40. CPE of a Cu electrode and the deposit after a CPE of **1a**,  $E^{apl} = -0.656$  V and initial deposition potential of **1a**  $E = -0.806$  V. The plot shows the charge build-up versus time,  $I = 0.1$  M  $PO_4^{3-}$ ,  $pH = 2.5$ ,  $[1a] = 0.5$  mM.

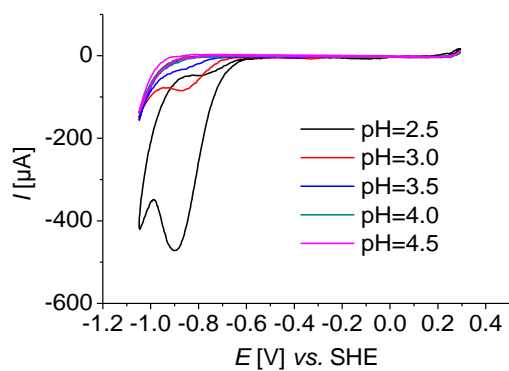

Figure S 41. pH-dependent CV measurements of **5**;  $[5] = 0.5$  mM,  $I = 0.1$  M  $PO_4^{3-}$ ,  $pH = 2.5$ , scan rate =  $100$  mVs $^{-1}$ .

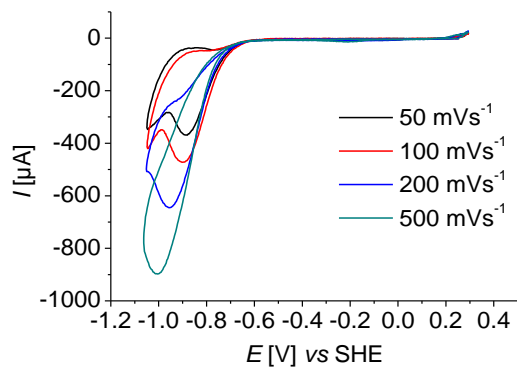

Figure S 42. Scan rate-dependent CV measurements of **5**;  $[5] = 0.5$  mM,  $I = 0.1$  M  $PO_4^{3-}$ ,  $pH = 2.5$ .

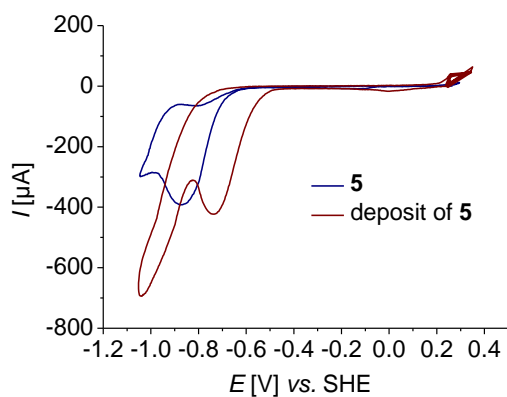

Figure S 43. CV data of **5** and the deposit of **5** after CPE at  $E = -0.806$  V;  $I = 0.1$  M  $\text{PO}_4^{3-}$ ,  $\text{pH} = 2.5$ , scan rate =  $100$  mV  $\text{s}^{-1}$ .

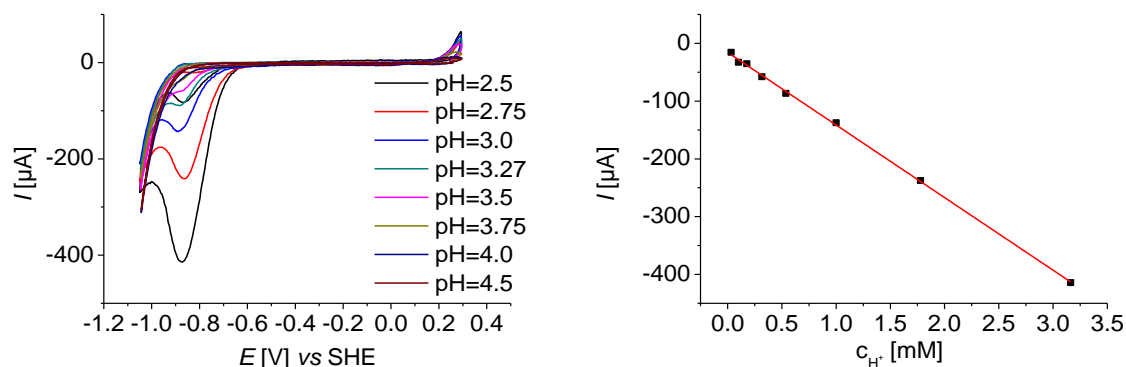

Figure S 44. Left: pH-dependent CV measurements of  $\text{Cu}(\text{OTf})_2$ ,  $[\text{Cu}(\text{OTf})_2] = 0.5$  mM,  $I = 0.1$  M  $\text{PO}_4^{3-}$ ,  $\text{pH} = 2.5$ , scan rate =  $100$  mV  $\text{s}^{-1}$ ; plot of the maximum current vs. proton concentration and the linear fit.

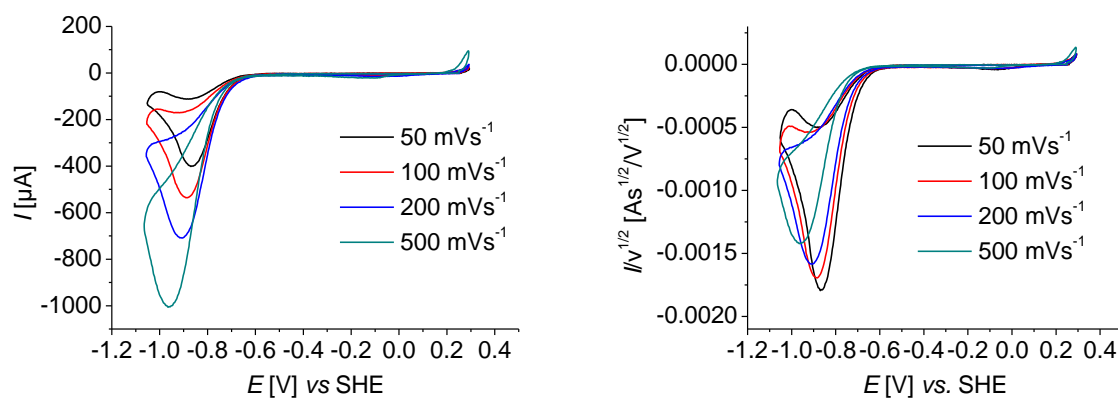

Figure S 45. Left: scan rate-dependent CV measurements of  $\text{Cu}(\text{OTf})_2$ ; right: normalised plot ( $I/v^{1/2}$ );  $[\text{Cu}(\text{OTf})_2] = 1.0$  mM,  $I = 0.1$  M  $\text{PO}_4^{3-}$ ,  $\text{pH} = 2.5$ .

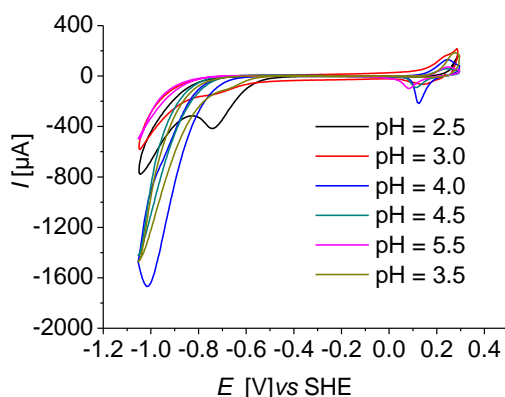

Figure S 46. pH-dependent CV measurements of the deposit of **1a**;  $I = 0.1 \text{ M PO}_4^{3-}$ , scan rate =  $100 \text{ mVs}^{-1}$ .

## 6) Electron Microprobe Analysis (EMPA)

### a) Sample preparation

Sample Preparation of the CPE deposit: A GC plate (1 x 1 cm) was placed in a 1.0 mM solution of **1a** and  $\text{Cu}(\text{OT})_2$ , respectively, CPE was performed at  $E = -0.806 \text{ V}$  for 15 min, the GC plate was washed carefully with Millipore water and dried at  $60^\circ \text{C}$ .

### b) Measurement

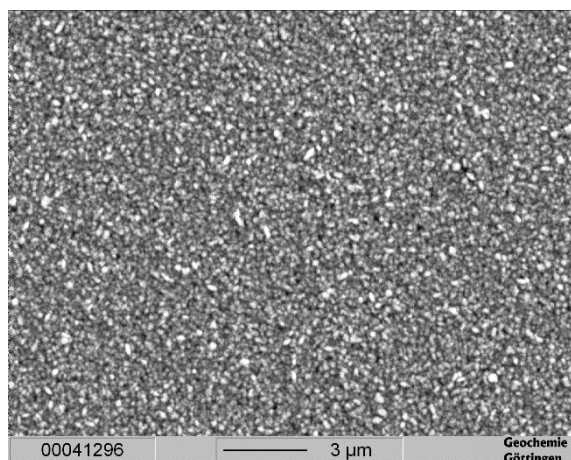

Figure S 47. Secondary electron image (SEI) of the electrode surface (carbon coated) showing the microcrystalline structure of the deposit after CPE of **1a**.

Measurements were carried out using a JEOL JXA8900 instrument equipped with 5 wavelength dispersive spectrometers (WDS). The beam conditions were set to an accelerating voltage of 15 kV, a beam current of 15 nA, and the beam diameter was varied between fully focused and  $15 \mu\text{m}$ .

In order to calibrate the measurements, the mineral- and synthetic standards cuprite ( $\text{Cu}_2\text{O}$ ), sanidine ( $\text{KAlSi}_3\text{O}_8$ ), wollastonite ( $\text{CaSiO}_3$ ), baryte ( $\text{BaSO}_4$ ), apatite ( $\text{Ca}_5\text{Cl}(\text{PO}_4)_3$ ), NaCl, topaz ( $\text{Al}_2\text{F}_2\text{SiO}_4$ ) and  $\text{Si}_3\text{N}_4$  were chosen to calibrate Cu, K, O, S, P, Cl, F and N respectively.

Quantification for Cu, K, O, S, P, Cl and F at different positions of the  $\text{Cu}(\text{OTf})_2$  sample revealed an average atom ratio for Cu : O of  $100 (\pm 5.4) : 14.7 (\pm 5.3)$  and none of the other elements were detected. Details of the measurements can be found in Table S 16.

Quantification for Cu, K, O, S, P, Cl, F and N at different positions of the sample of **1a** revealed an average atom ratio for Cu : O : N : Cl of 100 ( $\pm 1.8$ ) : 6 ( $\pm 1.5$ ) : 1.9 ( $\pm 0.3$ ) : 7 ( $\pm 0.75$ ) and none of the other elements were detected. Details of the measurements can be found in Table S 17. The chloride impurity may arise from leaking SCE because the buffer did not contain Cl atoms as checked by elemental analysis.

Tables of the measurements

Table S 16.  $\text{Cu}(\text{OTf})_2$ .

| mass-%, normalised |      |       |       |       | atom-% |       |      |      |      |
|--------------------|------|-------|-------|-------|--------|-------|------|------|------|
| Cu                 | O    | P     | Cl    | K     | Cu     | O     | P    | Cl   | K    |
| 96.6               | 2.99 | 0.21  | 0.05  | 0.12  | 88.5   | 10.86 | 0.39 | 0.08 | 0.18 |
| 96.3               | 3.38 | 0.19  | <0.01 | 0.09  | 87.3   | 12.13 | 0.36 | bdl  | 0.13 |
| 96.4               | 3.44 | 0.06  | <0.01 | 0.07  | 87.4   | 12.37 | 0.10 | bdl  | 0.10 |
| 93.9               | 5.48 | 0.35  | <0.01 | 0.27  | 80.2   | 18.65 | 0.61 | bdl  | 0.38 |
| 95.8               | 4.14 | 0.09  | <0.01 | <0.01 | 85.1   | 14.59 | 0.16 | bdl  | bdl  |
| 94.8               | 5.25 | <0.01 | <0.01 | <0.01 | 81.8   | 18.00 | bdl  | bdl  | bdl  |
| 93.7               | 6.33 | <0.01 | <0.01 | <0.01 | 78.7   | 21.11 | bdl  | bdl  | bdl  |
| 95.3               | 4.50 | 0.24  | <0.01 | <0.01 | 83.6   | 15.69 | 0.43 | bdl  | bdl  |
| 98.2               | 1.72 | 0.04  | 0.04  | <0.02 | 93.3   | 6.51  | 0.09 | 0.06 | bdl  |
| 97.7               | 2.25 | 0.03  | 0.05  | 0.03  | 91.4   | 8.37  | 0.05 | 0.08 | 0.04 |
| 96.4               | 3.09 | 0.23  | 0.08  | 0.16  | 88.0   | 11.19 | 0.43 | 0.12 | 0.24 |
| 97.3               | 2.40 | 0.12  | 0.05  | 0.10  | 90.6   | 8.87  | 0.23 | 0.09 | 0.16 |
| 97.9               | 1.97 | 0.05  | 0.04  | <0.02 | 92.4   | 7.38  | 0.11 | 0.07 | bdl  |

S always <0.02 %

Table S 17. **1a**.

| mass-%, normalised |      |       |       |      | atom-% |       |      |      |      |
|--------------------|------|-------|-------|------|--------|-------|------|------|------|
| Cu                 | O    | N     | P     | Cl   | Cu     | O     | N    | P    | Cl   |
| 95.0               | 0.91 | 0.34  | <0.01 | 3.71 | 88.9   | 3.37  | 1.44 | bdl  | 6.23 |
| 94.7               | 0.94 | 0.33  | <0.02 | 3.98 | 88.3   | 3.49  | 1.40 | bdl  | 6.66 |
| 94.7               | 1.16 | 0.36  | <0.02 | 3.71 | 88.0   | 4.27  | 1.52 | bdl  | 6.17 |
| 94.8               | 1.20 | 0.39  | <0.02 | 3.58 | 87.9   | 4.42  | 1.64 | bdl  | 5.94 |
| 94.2               | 1.73 | 0.40  | <0.01 | 3.58 | 86.1   | 6.26  | 1.67 | bdl  | 5.86 |
| 94.9               | 1.22 | 0.34  | <0.01 | 3.54 | 88.1   | 4.49  | 1.44 | bdl  | 5.89 |
| 94.9               | 1.25 | 0.40  | <0.01 | 3.38 | 88.0   | 4.61  | 1.69 | bdl  | 5.60 |
| 94.6               | 1.30 | 0.36  | <0.01 | 3.62 | 87.6   | 4.79  | 1.49 | bdl  | 6.03 |
| 93.5               | 2.97 | 0.58  | 0.05  | 2.82 | 82.6   | 10.45 | 2.33 | 0.09 | 4.44 |
| 94.8               | 1.22 | 0.41  | <0.01 | 3.54 | 87.9   | 4.50  | 1.72 | bdl  | 5.86 |
| 94.9               | 1.27 | 0.38  | <0.01 | 3.39 | 88.1   | 4.67  | 1.58 | bdl  | 5.62 |
| 94.4               | 1.49 | 0.43  | <0.02 | 3.67 | 86.7   | 5.44  | 1.78 | bdl  | 6.07 |
| 94.7               | 1.32 | 0.39  | <0.01 | 3.59 | 87.5   | 4.85  | 1.62 | bdl  | 5.94 |
| 94.5               | 1.37 | 0.45  | <0.01 | 3.58 | 87.0   | 5.01  | 1.90 | bdl  | 5.93 |
| 94.3               | 1.46 | <0.13 | <0.01 | 3.88 | 87.0   | 5.34  | bdl  | bdl  | 6.41 |
| 95.2               | 1.34 | <0.13 | <0.01 | 3.19 | 88.5   | 4.94  | bdl  | bdl  | 5.33 |

|      |      |       |       |      |      |      |      |      |      |
|------|------|-------|-------|------|------|------|------|------|------|
| 95.6 | 1.09 | 0.38  | <0.02 | 2.91 | 89.5 | 4.03 | 1.62 | bdl  | 4.86 |
| 95.2 | 1.23 | <0.12 | <0.01 | 3.29 | 88.6 | 4.56 | bdl  | bdl  | 5.51 |
| 94.6 | 1.42 | 0.44  | <0.01 | 3.52 | 87.1 | 5.20 | 1.83 | bdl  | 5.80 |
| 94.9 | 1.31 | 0.39  | <0.01 | 3.35 | 87.9 | 4.83 | 1.62 | bdl  | 5.56 |
| 94.4 | 1.49 | 0.39  | 0.04  | 3.66 | 86.8 | 5.44 | 1.64 | 0.07 | 6.01 |
| 94.6 | 1.48 | 0.36  | <0.01 | 3.57 | 87.1 | 5.41 | 1.52 | bdl  | 5.91 |
| 94.9 | 1.43 | <0.12 | <0.01 | 3.29 | 87.9 | 5.27 | bdl  | bdl  | 5.45 |
| 94.6 | 1.53 | <0.13 | 0.03  | 3.46 | 87.3 | 5.62 | bdl  | 0.06 | 5.73 |
| 94.6 | 1.28 | 0.54  | <0.01 | 3.57 | 87.1 | 4.69 | 2.27 | bdl  | 5.91 |
| 93.9 | 1.58 | 0.48  | <0.01 | 3.98 | 85.7 | 5.72 | 1.99 | bdl  | 6.50 |
| 93.9 | 1.77 | 0.37  | <0.01 | 3.94 | 85.6 | 6.41 | 1.52 | bdl  | 6.45 |
| 93.6 | 1.87 | 0.43  | <0.01 | 4.10 | 84.8 | 6.71 | 1.76 | bdl  | 6.66 |
| 93.3 | 1.77 | 0.46  | <0.01 | 4.44 | 84.5 | 6.38 | 1.88 | bdl  | 7.22 |
| 92.6 | 2.12 | <0.13 | <0.01 | 4.86 | 83.2 | 7.54 | bdl  | bdl  | 7.83 |
| 93.5 | 1.56 | 0.47  | 0.04  | 4.42 | 85.1 | 5.64 | 1.93 | 0.07 | 7.21 |
| 94.1 | 1.32 | 0.42  | <0.01 | 4.12 | 86.6 | 4.82 | 1.77 | bdl  | 6.80 |
| 94.6 | 1.08 | 0.38  | <0.02 | 3.93 | 87.9 | 3.98 | 1.62 | bdl  | 6.54 |
| 95.2 | 0.95 | 0.31  | <0.01 | 3.51 | 89.2 | 3.52 | 1.33 | bdl  | 5.89 |

S<0.02 %, F<0.06 %

## 7) XPS Measurements

### a) Sample Preparation

Dropcast sample: **1a** was dissolved in water, the solution was placed on the GC electrode (1x1 cm) and the water was evaporated at 60 °C.

CPE deposit: as described for EMPA.

### b) Measurement

The X-ray photoemission spectroscopy (XPS) was measured using an Omicron EA 125 analyser and Mg K $\alpha$ (1253.6 eV) X-ray source. The data analysis was done using casaXPS software. All XPS spectra were calibrated using the graphitic carbon 1s peak of the underlying glassy carbon electrode (284.6 eV).<sup>[15]</sup>

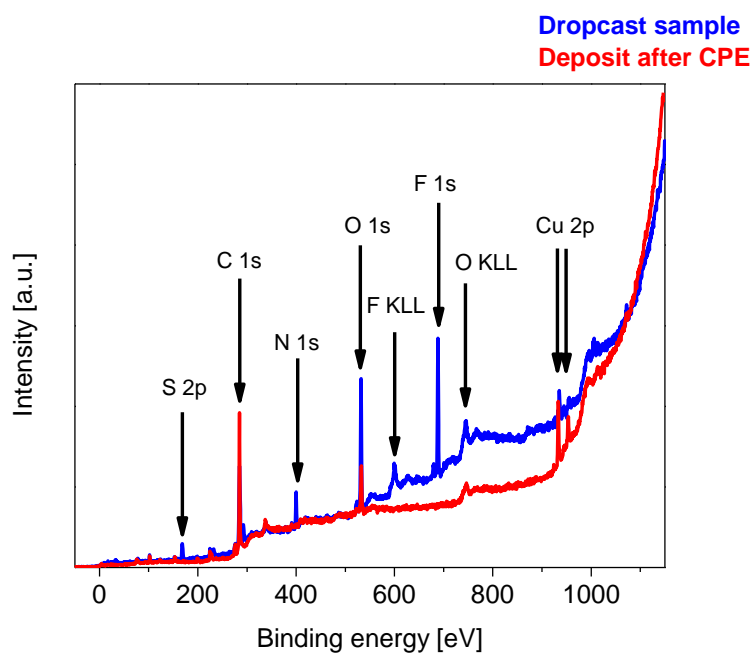

Figure S 48. Survey XPS spectra of a dropcast sample of **1a** on a glassy carbon electrode and of the glassy carbon electrode after CPE at an applied potential of  $-0.806$  V.

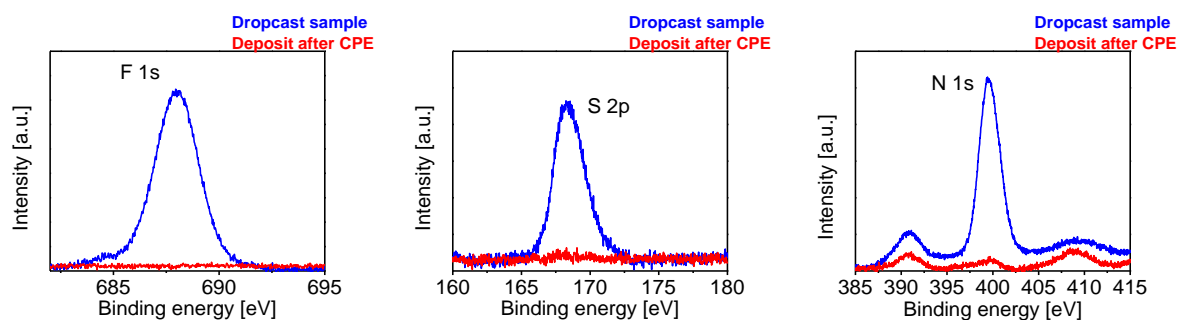

Figure S 49. High resolution XPS spectra of a dropcast sample of **1a** on a glassy carbon electrode and of the glassy carbon electrode after CPE at an applied potential of  $-0.806$  V; peaks of F and S from the triflate anion are not present and only traces of nitrogen are left after CPE.

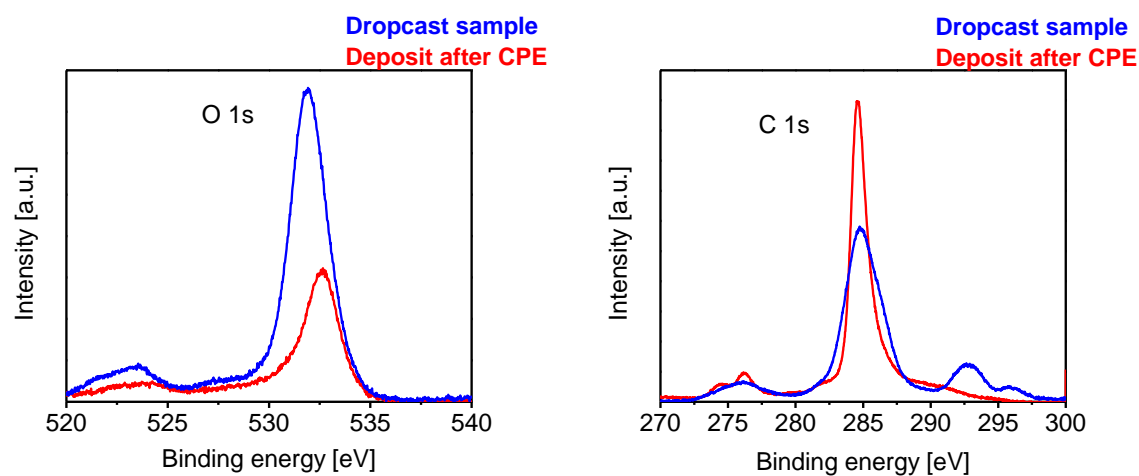

Figure S 50. High resolution XPS spectra of a dropcast sample of **1a** on a glassy carbon electrode and of the glassy carbon electrode after CPE at an applied potential of  $-0.806$  V; the O 1s peak of the deposit is shifted compared to the respective peak of **1a**, which corroborates the  $\text{Cu}_2\text{O}$  formation and oxidation state.

## 8) References

- 
- [1] M. Kügler, J. Gałęzowska, F. Schendzielorz, S. Dechert, S. Demeshko and I. Siewert, *Eur. J. Inorg. Chem.*, 2015, 2695.
- [2] C. H. Rochester, *J. Chem. Soc., Dalton Trans.*, 1972, 5.
- [3] a) B. Chiswell, F. Lions and B. S. Morris, *Inorg. Chem.*, 1964, **3**, 110; b) Z. Liu, T. Ouyang, H. Cho; Y. Goti, B. Feldman, F. Mao and A. Heller, U.S. Pat. Appl. Publ., 20090099434.
- [4] U. S. Schubert, E. Eschbaumer and M. Heller, *Org. Lett.*, 2000, **2**, 3373.
- [5] M. G. Miles, G. Doyle, R. P. Cooney and R. S. Tobias, *Spectrochim. Acta Part A Mol. Spectrosc.*, 1969, **25**, 1515.
- [6] G. M. Sheldrick, *Acta Crystallogr. Sect. A*, 2008, **64**, 112.
- [7] *X-Red*, STOE & Cie GmbH: Darmstadt, Germany, 2002.
- [8] P. Gans and A. Sabatini, A. Vacca, *Talanta*, 1996, **43**, 1739.
- [9] P. Gans, *Data Fitting in the Chemical Sciences: by the Method of Least Squares*; John Wiley & Sons: Chichester, U.K., 1992.
- [10] L. Alderighi, P. Gans, A. Ienco, D. Peters, A. Sabatini and A. Vacca, *Coord. Chem. Rev.*, 1999, **184**, 311.
- [11] R. A. Binstead, A. D. Zuberbühler and B. Jung, *Spectfit*, version 3.0.38; Windows; Spectrum Software Associates: Chapel Hill, NC, 2006.
- [12] a) I. Török, P. Surdy, A. Rockenbauer, L. Korecz Jr, G. J. Anthony A. Koolhaas and T. Gajda, *J. Inorg. Biochem.*, 1998, **71**, 7; b) H. Sigel, A. Saha, N. Saha, P. Carloni, L. E. Kapinos and R. Griesser, *J. Inorg. Biochem.*, 2000, **78**, 129; c) S. S. Babić, A. J. M. Horvat, D. Mutavdžić Pavlović and M. Kaštelan-Macan, *Anal. Chem.*, 2007, **26**, 1043.
- [13] R. K. Boggess and R. B. Martin, *Inorg. Chem.*, 1974, **13**, 1525.
- [14] The electrochemical current is proportional to the square root of the substrate concentration:  $i_c = Fc_p\sqrt{D_pkc_A}$ .  $F$  is the Faraday constant,  $c_p$  the concentration of the redox catalyst,  $D_p$  its diffusion coefficient,  $k$  the rate constant and  $c_A$  the concentration of the substrate. Thus, a linear dependence of the current on the substrate concentration can be regarded as a process with second-order kinetics. See for example: a) J. M. Savéant, K. Su, *J. Electroanal. Chem.*, 1984, **171**, 341; b) J. M. Savéant, *Chem. Rev.*, 2008, **108**, 2348.
- [15] A. Dekanskia, J. Stevanovic, R. Stevanovic, B. Nikolic and V. M. Jovanovic, *Carbon*, 2001, **39**, 11955.
